# Supplementary material for: An efficient asymmetric hydrophosphonylation of unsaturated amides catalyzed by rare-earth metal amides [(Me3Si)2N]3RE(μ-Cl)Li(THF)3 with phenoxy-functionalized chiral prolinols
Source: Royal Society of Chemistry journal article supplement (doi:10.1039/c7ra00468k), 2017-01-01
Supplement: c7ra00468k1.pdf [file c7ra00468k1.pdf]

Supporting Information for:

**Efficient Asymmetric Hydrophosphonylation of Unsaturated Amides Catalyzed by Rare-Earth Metal Amides  $[(\text{Me}_3\text{Si})_2\text{N}]_3\text{RE}(m\text{-Cl})\text{Li}(\text{THF})_3$  with Phenoxy-Functionalized Chiral Prolinols**

Zenghui Fei<sup>a</sup>, Chao Zeng<sup>a</sup>, Chengrong Lu<sup>a</sup>, Bei Zhao<sup>a,\*</sup> and Yingming Yao<sup>a,\*</sup>

Table of contents

|                                                                                                                      | Page |
|----------------------------------------------------------------------------------------------------------------------|------|
| General Methods                                                                                                      | 2    |
| Crystallographic Data for Complex <b>8</b>                                                                           | 3    |
| X-Ray structure of complex <b>8</b> , the selected bond lengths and bond angles and the characterization data        | 3    |
| General procedure for the synthesis of substrates and their characterization data                                    | 4    |
| General procedure for the synthesis of products and their characterization data                                      | 8    |
| <sup>1</sup> H NMR, <sup>13</sup> C NMR, <sup>31</sup> P NMR, and <sup>19</sup> F NMR spectra and HPLC chromatograms | 15   |
| References                                                                                                           | 56   |

---

\* Corresponding author. Tel.: +86 512 65880305; fax: +86 512 65880305; e-mail: zhaobei@suda.edu.cn

\* Corresponding author. e-mail: yaoym@suda.edu.cn

## General Methods

All reagents are commercially available, reagent grade, and used as received unless otherwise noted. The reactions involving air and water sensitive components were performed with the standard Schlenk techniques. Solvents, such as THF, toluene and hexane, were degassed and distilled from sodium benzophenone ketyl before use.

Analytical thin layer chromatography (TLC) was performed using F254 pre-coated silica gel plate (0.2 mm thickness). After elution, plates were detected using UV radiation (254 nm) on a UV lamp.

Flash chromatography was performed using 200-300 mesh silica gel with freshly distilled solvents. Columns were typically packed as slurry and equilibrated with the appropriate solvent system prior to use.

Nuclear magnetic resonance spectra were obtained on a Bruker AV-400 apparatus ( $\text{CDCl}_3$  as solvent). Chemical shifts for NMR spectra are reported as  $\delta$  in units of parts per million (ppm) downfield from  $\text{SiMe}_4$  ( $\delta$  0.0) and relative to the signal of chloroform-d ( $\delta$  7.26, singlet). Multiplicities were given as: s (singlet); d (doublet); t (triplet); q (quartet); dd (doublets of doublet); or m (multiplets).

High Resolution Mass (HRMS) spectra were obtained using Bruker ESI-TOF.

The ee values determination was carried out using HPLC (Agilent Technologies 1200 Series) with Daicel Chiralcel columns at 23-25 °C. Optical rotation was measured using an Autopol IV Polarimeter equipped with a sodium vapor lamp at 589 nm. The absolute configuration of **7a** was determined by the combination of single crystal diffraction, chiral HPLC and the optical rotation analysis. Hence, **7b-7t** were assigned by analogy, assuming the same reaction pathway and the same analysis.

Rare earth metal analysis was performed by EDTA titration with a xylenol orange indicator and a hexamine buffer. Carbon, hydrogen and nitrogen analyses were performed by direct combustion with a Carlo-Erba EA-1110 instrument.

Suitable single crystals of complex **8** was sealed in a thin-walled glass capillary for determining the single-crystal structure. Intensity data were collected with a Rigaku Mercury CCD area detector in  $\omega$  scan mode using Mo- $K\alpha$  radiation ( $\lambda = 0.71075 \text{ \AA}$ ). The diffracted intensities were corrected for Lorentz polarization effects and empirical absorption corrections. Details of the intensity data collection and crystal data are given in Table 1. All the non-hydrogen atoms were refined anisotropically. All the H atoms were held stationary and included in the structure factor calculation in the final stage of full-matrix least-squares refinement. The structures were solved and refined using SHELEXL-97 programs.

## Experimental section:

### General Procedure for the Preparation of the Rare-Earth Metal Complex **8**<sup>1</sup>:

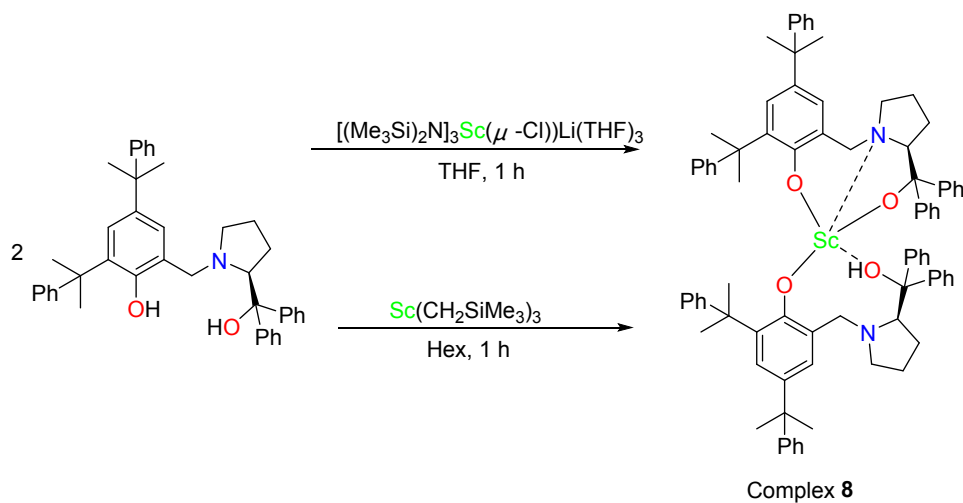

**Table 1 Crystallographic Data for Complex **8****

| Compound                            | <b>8</b>                                                  | Compound                                    | <b>8</b>      |
|-------------------------------------|-----------------------------------------------------------|---------------------------------------------|---------------|
| Formula                             | $\text{C}_{84}\text{H}_{87}\text{N}_2\text{O}_4\text{Sc}$ | $F(000)$                                    | 2632          |
| fw                                  | 1233.52                                                   | $\theta_{\text{max}}/^\circ$                | 27.50         |
| Crystal system                      | Orthorhombic                                              | Collected                                   | 44528         |
| Crystal size/mm                     | $0.40 \times 0.20 \times 0.20$                            | Unique reflns                               | 20922         |
| Space group                         | P 21 21 21                                                | Obsd reflns, [ $I > 2.0\sigma(I)$ ]         | 17160         |
| $a/\text{\AA}$                      | 13.546                                                    | No. of variables                            | 832           |
| $b/\text{\AA}$                      | 24.517                                                    | GOF                                         | 1.008         |
| $c/\text{\AA}$                      | 27.817                                                    | $R$                                         | 0.0651        |
| $V/\text{\AA}^3$                    | 9237.9                                                    | wR                                          | 0.1600        |
| $Z$                                 | 4                                                         | $R_{\text{int}}$                            | 0.0466        |
| $D_{\text{calcd}}/\text{g cm}^{-3}$ | 0.887                                                     | Largest diff. peak, hole/ $\text{\AA}^{-3}$ | 0.384, -0.281 |
| $\mu/\text{mm}^{-1}$                | 0.119                                                     |                                             |               |

### X-Ray Structures of Complex **8** and selected bond lengths and bond angles

Crystals of complex **8** suitable for X-ray diffraction were obtained in toluene and hexane at room temperature. The definitive structure is shown in Figure 1, and the corresponding selected bond lengths and angles are provided in the figure captions.

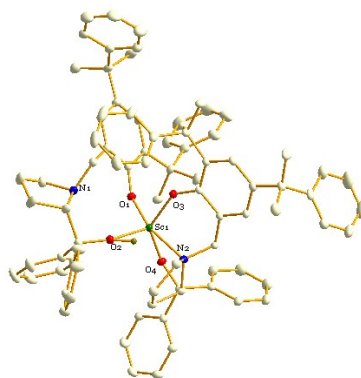

**Figure 1.** Molecular structure of **8** showing 20% probability ellipsoids. Hydrogen atoms are omitted for clarity. Selected bond lengths (Å) and bond angles (°): Sc(1)–O(1) 2.0350(16), Sc(1)–O(2) 1.9518(17), Sc(1)–O(3) 2.0141(16), Sc(1)–O(4) 1.9833(16), Sc(1)–N(2) 2.3539(19), O(2)–Sc(1)–O(4) 108.05(7), O(2)–Sc(1)–O(3) 115.27(7), O(4)–Sc(1)–O(3) 132.87(7), O(2)–Sc(1)–O(1) 97.92(7), O(4)–Sc(1)–O(1) 99.48(7), O(2)–Sc(1)–O(1) 92.29(6), O(2)–Sc(1)–N(2) 99.29(7), O(4)–Sc(1)–N(2) 74.83(7), O(3)–Sc(1)–N(2) 80.64(7), O(1)–Sc(1)–N(2) 162.78(7).

### General procedure for the synthesis of the substrates **6a-6t** and their characterization data

To a dichloromethane solution of 16 mmol substituted amine and 16 mmol Et<sub>3</sub>N, a substituted unsaturated acyl chloride was added dropwise, keeping the reaction temperature at 0 °C. The mixture was continued to stir for 2 h at room temperature, then aqueous NaHCO<sub>3</sub> (25 mL) was added. The crude product was extracted with DCM (3 x 50 mL). The combined organic layers were washed with 1M HCl (3 x 20 mL) and brine (3 x 20 mL) and dried over Na<sub>2</sub>SO<sub>4</sub>. Solvent was removed in vacuo. then the crude product was purified by column chromatography (ethyl acetate-petroleum ether, 1:10)<sup>2</sup>.

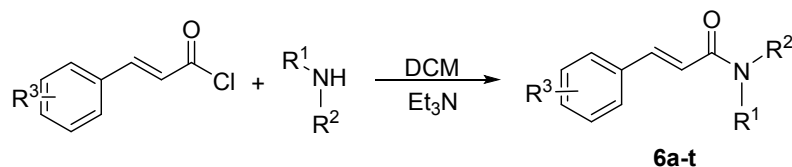

Characterization data as follows:

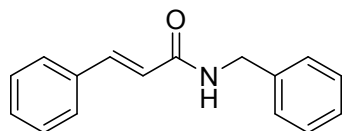

**N-benzylcinnamamide (6a):** White solid. <sup>1</sup>H NMR (400 MHz, CDCl<sub>3</sub>): δ 7.67 (d, *J* = 13.80 Hz, 1H, CH=CH), 7.48 (m, 2H, Ph), 7.34 (m, 8H, Ph), 6.46 (d, *J* = 15.60 Hz, 1H, CH=CH), 5.89 (s, 1H, NH), 4.57 (d, *J* = 5.72 Hz, 2H, CH<sub>2</sub>).

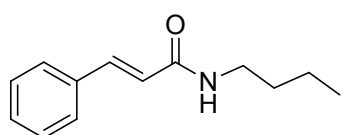

**N-butylcinnamamide (6b):** White solid. <sup>1</sup>H NMR (400 MHz, CDCl<sub>3</sub>): δ 7.61 (d, *J* = 15.60 Hz,

1H, CH=CH), 7.33 (m, 3H, Ph), 6.38 (d,  $J = 15.60$  Hz, 1H, CH=CH), 5.67 (s, 1H, NH), 3.37 (m, 2H, CH<sub>2</sub>), 1.53 (m, 2H, CH<sub>2</sub>), 1.36 (m, 2H, CH<sub>2</sub>), 0.92 (t,  $J = 14.64$  Hz, 3H, CH<sub>3</sub>).

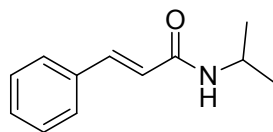

**N-isopropylcinnamamide (6c):** White solid. <sup>1</sup>H NMR(400 MHz, CDCl<sub>3</sub>):  $\delta$  7.61 (d,  $J = 15.60$  Hz, 1H, CH=CH), 7.45 (m, 2H, Ph), 7.30 (m, 3H, Ph), 6.41 (d,  $J = 15.60$  Hz, 1H, CH=CH), 5.83 (d,  $J = 6.08$  Hz, 1H, NH), 4.21 (m, 1H, CH), 1.18 (d,  $J = 6.56$  Hz, 6H, CH<sub>3</sub>).

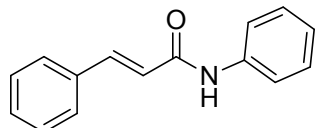

**N-phenylcinnamamide (6d):** White solid. <sup>1</sup>H NMR(400 MHz, CDCl<sub>3</sub>):  $\delta$  7.92 (s, 1H, NH), 7.74 (d,  $J = 15.52$  Hz, 1H, CH=CH), 7.65 (m, 2H, Ph), 7.45 (m, 2H, Ph), 7.32 (m, 5H, Ph), 7.11 (m, 1H, Ph), 6.63 (d,  $J = 15.52$  Hz, 1H, CH=CH).

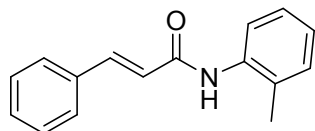

**N-(o-tolyl)cinnamamide (6e):** White solid. <sup>1</sup>H NMR(400 MHz, CDCl<sub>3</sub>):  $\delta$  7.95 (s, 1H, NH), 7.76 (d,  $J = 15.52$  Hz, 1H, CH=CH), 7.52 (m, 2H, Ph), 7.36 (m, 3H, Ph), 7.19 (m, 2H, Ph), 7.10 (m, 2H, Ph), 6.58 (d,  $J = 15.64$  Hz, 1H, CH=CH).

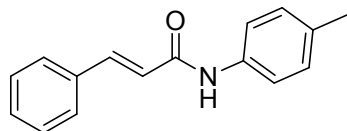

**N-(p-tolyl)cinnamamide (6f):** White solid. <sup>1</sup>H NMR(400 MHz, CDCl<sub>3</sub>):  $\delta$  8.12 (s, 1H, NH), 7.64 (d,  $J = 15.56$  Hz, 1H, CH=CH), 7.46 (m, 2H, Ph), 7.33 (m, 2H, Ph), 7.20 (m, 3H, Ph), 7.01 (m, 2H, Ph), 6.56 (d,  $J = 15.52$  Hz, 1H, CH=CH), 2.19 (s, 1H, CH<sub>3</sub>).

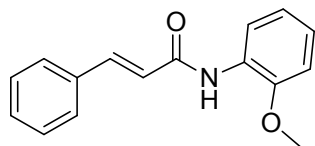

**N-(2-methoxyphenyl)cinnamamide (6g):** White solid. <sup>1</sup>H NMR(400 MHz, CDCl<sub>3</sub>):  $\delta$  8.51 (m, 1H, Ph), 7.93 (s, 1H, NH), 7.74 (d,  $J = 15.48$  Hz, 1H, CH=CH), 7.55 (m, 2H, Ph), 7.37 (m, 3H, Ph), 7.00 (m, 2H, Ph), 6.87 (m, 1H, Ph), 6.59 (d,  $J = 15.52$  Hz, 1H, CH=CH), 3.90 (s, 3H, CH<sub>3</sub>).

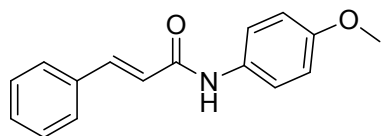

**N-(4-methoxyphenyl)cinnamamide (6h):** White solid. <sup>1</sup>H NMR(400 MHz, CDCl<sub>3</sub>):  $\delta$  7.78 (s, 1H, NH), 7.72 (d,  $J = 15.48$  Hz, 1H, CH=CH), 7.53 (m, 4H, Ph), 7.31 (m, 3H, Ph), 6.82 (m, 2H, Ph), 6.54 (d,  $J = 15.52$  Hz, 1H, CH=CH), 3.75 (s, 3H, CH<sub>3</sub>).

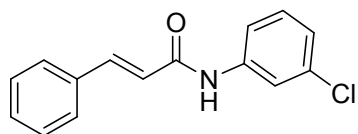

**N-(3-chlorophenyl)cinnamamide (6i):** White solid.  $^1\text{H}$  NMR(400 MHz,  $\text{CDCl}_3$ ):  $\delta$  7.85 (s, 1H, NH), 7.76 (m, 2H, Ph, CH=CH), 7.50 (m, 3H, Ph), 7.34 (m, 3H, Ph), 7.23 (m, 1H, Ph), 7.09 (m, 1H, Ph), 6.60 (d,  $J = 15.52$  Hz, 1H, CH=CH).

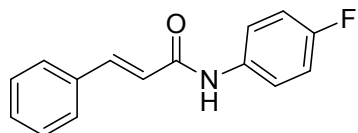

**N-(4-fluorophenyl)cinnamamide (6j):** White solid.  $^1\text{H}$  NMR(400 MHz,  $\text{CDCl}_3$ ):  $\delta$  7.75 (d,  $J = 15.48$  Hz, 1H, CH=CH), 7.56 (m, 4H, Ph), 7.37 (m, 3H, Ph), 7.02 (m, 2H, Ph), 6.53 (d,  $J = 15.52$  Hz, 1H, CH=CH).

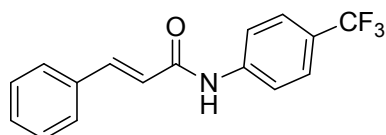

**N-(4-(trifluoromethyl)phenyl)cinnamamide (6k):** White solid.  $^1\text{H}$  NMR(400 MHz,  $\text{CDCl}_3$ ):  $\delta$  7.79 (s, 1H, NH), 7.72 (m, 2H, Ph, CH=CH), 7.59 (m, 2H, Ph), 7.49 (m, 3H, Ph), 7.38 (m, 3H, Ph), 6.55 (d,  $J = 15.48$  Hz, 1H, CH=CH).

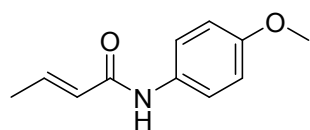

**(E)-N-(4-methoxyphenyl)but-2-enamide (6l):** White solid.  $^1\text{H}$  NMR(400 MHz,  $\text{CDCl}_3$ ):  $\delta$  7.55 (m, 3H, Ph, NH), 6.83 (m, 3H, Ph, CH=CH), 5.96 (d,  $J = 15.08$  Hz, CH=CH, 1H), 3.77(s, 3H,  $\text{CH}_3$ ), 1.85 (d,  $J = 5.44$  Hz, 3H,  $\text{CH}_3$ ).

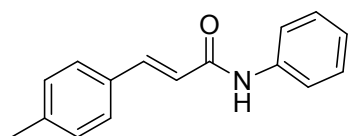

**(E)-N-phenyl-3-(p-tolyl)acrylamide (6m):** White solid.  $^1\text{H}$  NMR(400 MHz,  $\text{CDCl}_3$ ):  $\delta$  7.73 (m, d,  $J = 15.48$  Hz, 1H, CH=CH), 7.61 (m, 2H, Ph), 7.43 (s, 1H, NH), 7.38 (m, 2H, Ph), 7.32 (m, 2H, Ph), 7.16 (m, 3H, Ph), 6.52 (d,  $J = 15.48$  Hz, 1H, CH=CH), 2.35 (s, 3H,  $\text{CH}_3$ ).

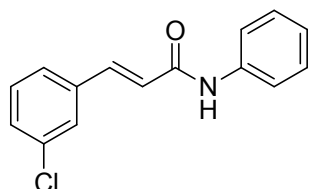

**(E)-3-(3-chlorophenyl)-N-phenylacrylamide (6n):** White solid.  $^1\text{H}$  NMR(400 MHz,  $\text{CDCl}_3$ ):  $\delta$  7.68 (m, d,  $J = 15.48$  Hz, 1H, CH=CH), 7.61(m, 2H, NH, Ph), 7.49 (m, 2H, Ph), 7.31 (m, 5H, Ph), 7.12 (m, 1H, Ph), 6.56 (d,  $J = 15.48$  Hz, 1H, CH=CH).

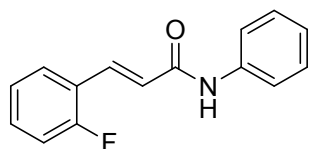

**(E)-3-(2-fluorophenyl)-N-phenylacrylamide (6o):** White solid.  $^1\text{H}$  NMR(400 MHz,  $\text{CDCl}_3$ ):  $\delta$  7.82 (m, d,  $J = 15.48$  Hz, 1H, CH=CH), 7.60(m, 2H, NH, Ph), 7.44 (m, 2H, Ph), 7.34 (m, 3H, Ph), 7.14 (m, 3H, Ph), 6.71 (d,  $J = 15.72$  Hz, 1H, CH=CH).

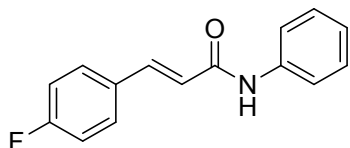

**(E)-3-(4-fluorophenyl)-N-phenylacrylamide (6p):** White solid.  $^1\text{H}$  NMR(400 MHz,  $\text{CDCl}_3$ ):  $\delta$  7.72 (m, d,  $J = 15.48$  Hz, 1H, CH=CH), 7.60 (m, 2H, NH, Ph), 7.50 (m, 2H, Ph), 7.33 (m, 3H, Ph), 7.05 (m, 3H, Ph), 6.47 (d,  $J = 15.48$  Hz, 1H, CH=CH).

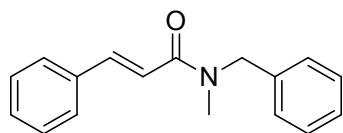

**N-benzyl-N-methylcinnamamide (6q):** White solid.  $^1\text{H}$  NMR(400 MHz,  $\text{CDCl}_3$ ):  $\delta$  7.67 (m, d,  $J = 15.32$  Hz, 1H, CH=CH), 7.49 (m, 1H, Ph), 7.38 (m, 1H, Ph), 7.25 (m, 8H, Ph), 6.94 (d,  $J = 15.36$  Hz, 1H, CH=CH), 4.84 (m, 2H,  $\text{CH}_2$ ), 2.94 (m, 3H,  $\text{CH}_3$ ).

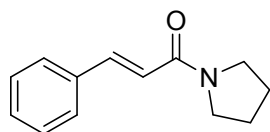

**(E)-3-phenyl-1-(pyrrolidin-1-yl)prop-2-en-1-one (6r):** White solid.  $^1\text{H}$  NMR (400 MHz,  $\text{CDCl}_3$ ):  $\delta$  7.70 (d,  $J = 13.80$  Hz, 1H, CH=CH), 7.52 (m, 2H, Ph), 7.35 (m, 3H, Ph), 6.73 (d,  $J = 15.52$  Hz, 1H, CH=CH), 3.63 (m, 4H,  $\text{CH}_2$ ), 1.99 (m, 2H,  $\text{CH}_2$ ), 1.88 (m, 2H,  $\text{CH}_2$ ).

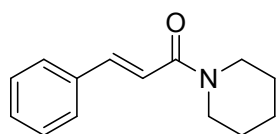

**(E)-3-phenyl-1-(piperidin-1-yl)prop-2-en-1-one (6s):** White solid.  $^1\text{H}$  NMR (400 MHz,  $\text{CDCl}_3$ ):  $\delta$  7.61 (d,  $J = 15.48$  Hz, 1H, CH=CH), 7.52 (m, 2H, Ph), 7.34 (m, 3H, Ph), 6.91 (d,  $J = 15.48$  Hz, 1H, CH=CH), 3.66 (m, 4H,  $\text{CH}_2$ ), 1.67 (m, 2H,  $\text{CH}_2$ ), 1.60 (m, 4H,  $\text{CH}_2$ ).

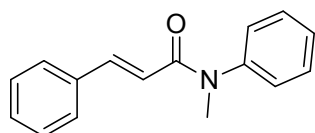

**N-methyl-N-phenylcinnamamide (6t):** White solid.  $^1\text{H}$  NMR (400 MHz,  $\text{CDCl}_3$ ):  $\delta$  7.72 (d,  $J = 15.40$  Hz, 1H, CH=CH), 7.23 (m, 10H, Ph), 6.41 (d,  $J = 15.12$  Hz, 1H, CH=CH), 3.38 (s, 3H,  $\text{CH}_3$ ).

### General procedure for the synthesis of the substrates 7a-7t and their characterization data

Scandium amide  $[(\text{Me}_3\text{Si})_2\text{N}]_3\text{Sc}(\mu\text{-Cl})\text{Li}(\text{THF})_3$  (0.05 mmol, 39.15 mg) was added to a stirred solution of  $\text{H}_2\text{L}^2$  (0.10 mmol, 59.50 mg) in THF (1 mL) under argon atmosphere. The mixture was stirred at room temperature for 1 h. Then,  $\text{HPO}(\text{OEt})_2$  (1.00 mmol, 129  $\mu\text{L}$ ) was added in the above solution and stirred for 10 min. After that, unsaturated amide (0.5 mmol, 118 mg) was added to the mixture. The reaction system was stirred for further 12 h at room temperature, quenched by water. The crude product was purified by column chromatography (ethyl acetate-petroleum ether, 1:10) to obtain the final hydrophosphonylation product. The enantiomeric excess of hydrophosphonylation was determined by chiral HPLC analysis.

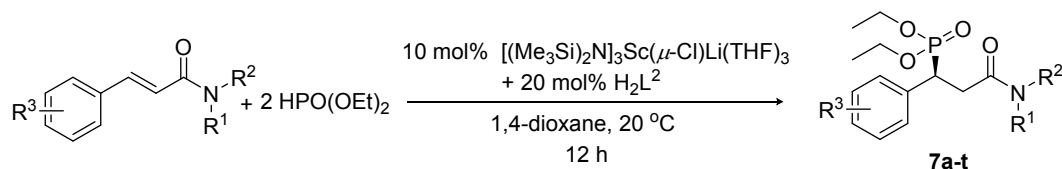

### Characterization data as follows:

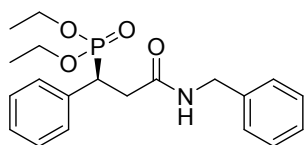

**(S)-diethyl (3-(benzylamino)-3-oxo-1-phenylpropyl)phosphonate (7a):** A white powder: yield 99%;  $[\alpha]_{\text{D}}^{24} = 12^\circ$  ( $c$  0.4,  $\text{CH}_3\text{OH}$ );  $^1\text{H NMR}$  (400 MHz,  $\text{CDCl}_3$ ):  $\delta$  7.71 (m, 1H, NH), 7.34 (m, 2H, Ph), 7.18 (m, 3H, Ph), 7.02 (m, 3H, Ph), 6.78 (m, 2H, Ph), 4.28 (m, 1H, CH), 4.03 (m, 1H, CH), 3.84 (m, 2H,  $\text{CH}_2$ ), 3.75 (m, 2H,  $\text{CH}_2$ ), 3.62 (m, 1H, CH), 3.44 (m, 1H, CH), 3.06 (m, 2H,  $\text{CH}_2$ ), 1.11 (t,  $J = 14.00$  Hz, 3H,  $\text{CH}_3$ ), 0.85 (t,  $J = 15.30$  Hz, 3H,  $\text{CH}_3$ );  $^{13}\text{C NMR}$  (100 MHz,  $\text{CDCl}_3$ ):  $\delta$  169.65, 137.96, 134.75, 128.99, 127.97, 127.73, 126.85, 126.29, 62.63, 61.55, 42.62, 40.54, 35.97, 15.86;  $^{31}\text{P NMR}$  (162 MHz,  $\text{CDCl}_3$ ):  $\delta$  28.03; 85% *ee*, HPLC: IA, 90% hexanes, 10% *i*PrOH, 1.0 mL/min, 12.1 min (major), 17.7 min (minor); HRMS (ESI, positive)  $m/z$  calcd. for  $\text{C}_{20}\text{H}_{26}\text{NO}_4\text{P}$   $[\text{M}+\text{H}]^+$  376.1678; found 376.1670.

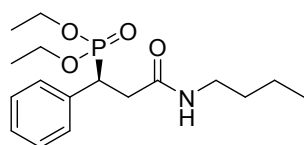

**(S)-diethyl (3-(butylamino)-3-oxo-1-phenylpropyl)phosphonate (7b):** Colorless oil: yield 90%;  $[\alpha]_{\text{D}}^{24} = 15^\circ$  ( $c$  0.5,  $\text{CH}_3\text{OH}$ );  $^1\text{H NMR}$  (400 MHz,  $\text{CDCl}_3$ ):  $\delta$  7.40 (m, 2H, Ph), 7.29 (m, 3H, Ph), 4.06 (m, 2H,  $\text{CH}_2$ ), 3.79 (m, 2H,  $\text{CH}_2$ ), 3.62 (m, 1H, CH), 3.13 (m, 1H, CH), 3.01 (m, 3H,  $\text{CH}_2$ ), 1.31 (t,  $J = 13.84$  Hz, 3H,  $\text{CH}_3$ ), 1.25 (m, 2H,  $\text{CH}_2$ ), 1.10 (m, 2H,  $\text{CH}_2$ ), 1.03 (t,  $J = 13.80$  Hz, 3H,  $\text{CH}_3$ ), 0.77 (t,  $J = 14.28$  Hz, 3H,  $\text{CH}_3$ );  $^{13}\text{C NMR}$  (100 MHz,  $\text{CDCl}_3$ ):  $\delta$  169.33, 134.99, 134.92, 128.80, 127.94, 126.81, 62.45, 61.49, 40.58, 38.61, 36.44, 30.87, 19.29, 15.63, 13.15;  $^{31}\text{P NMR}$  (162 MHz,  $\text{CDCl}_3$ ):  $\delta$  28.50; 75% *ee*, HPLC: IA, 90% hexanes, 10% *i*PrOH, 1.0 mL/min, 7.9 min (major), 8.6 min (minor); HRMS (ESI, positive)  $m/z$  calcd. for  $\text{C}_{17}\text{H}_{28}\text{NO}_4\text{P}$   $[\text{M}+\text{H}]^+$  342.1834; found 342.1847.

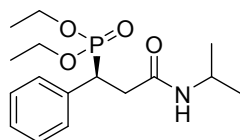



**(S)-diethyl (3-(isopropylamino)-3-oxo-1-phenylpropyl)phosphonate (7c):** Colorless oil : yield 83%;  $[\alpha]_D^{24} = 17^\circ$  (*c* 0.5, CH<sub>3</sub>OH); <sup>1</sup>H NMR (400 MHz, CDCl<sub>3</sub>):  $\delta$  7.36 (m, 2H, Ph), 7.27 (m, 2H, Ph), 7.21 (m, 1H, Ph), 5.54 (d, *J* = 7.00 Hz, 1H, NH), 4.07 (m, 2H, CH<sub>2</sub>), 3.88 (m, 2H, CH<sub>2</sub>), 3.69 (m, 2H, CH<sub>2</sub>), 2.92 (m, 1H, CH), 2.69 (m, 1H, CH), 1.28 (d, *J* = 14.00 Hz, 3H, CH<sub>3</sub>), 1.04 (m, 6H, CH<sub>3</sub>), 0.80 (d, *J* = 6.5 Hz, 3H, CH<sub>3</sub>); <sup>13</sup>C NMR (100 MHz, CDCl<sub>3</sub>):  $\delta$  168.99, 135.36, 129.37, 128.31, 127.21, 63.00, 61.97, 41.15, 39.76, 36.87, 22.30, 16.39; <sup>31</sup>P NMR (162 MHz, CDCl<sub>3</sub>):  $\delta$  28.35; 64% *ee*, HPLC: IA, 90% hexanes, 10% *i*PrOH, 1.0 mL/min, 8.3 min (major), 10.3 min (minor); HRMS (ESI, positive) *m/z* calcd. for C<sub>16</sub>H<sub>26</sub>NO<sub>4</sub>P [M+H]<sup>+</sup> 328.1678; found 328.1669.

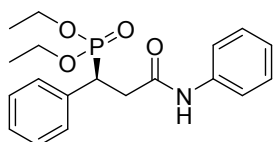

**(S)-diethyl (3-oxo-1-phenyl-3-(phenylamino)propyl)phosphonate (7d):** A white powder: yield 98%;  $[\alpha]_D^{24} = 21^\circ$  (*c* 0.2, CH<sub>3</sub>OH); <sup>1</sup>H NMR (400 MHz, CDCl<sub>3</sub>):  $\delta$  9.68 (s, 1H, NH), 7.51 (m, 4H, Ph), 7.24 (m, 5H, Ph), 7.00 (m, 1H, Ph), 4.07 (m, 2H, CH<sub>2</sub>), 3.96 (m, 2H, CH<sub>2</sub>), 3.63 (m, 1H, CH), 3.30 (m, 2H, CH<sub>2</sub>), 1.28 (t, *J* = 14.16 Hz, 3H, CH<sub>3</sub>), 1.01 (t, *J* = 14.12 Hz, 3H, CH<sub>3</sub>); <sup>13</sup>C NMR (100 MHz, CDCl<sub>3</sub>):  $\delta$  167.98, 138.39, 134.86, 134.79, 128.79, 128.12, 127.02, 123.06, 119.10, 62.98, 61.77, 40.09, 36.86, 15.84; <sup>31</sup>P NMR (162 MHz, CDCl<sub>3</sub>):  $\delta$  28.16; 85% *ee*, HPLC: IA, 90% hexanes, 10% *i*PrOH, 1.0 mL/min, 11.2 min (major), 14.1 min (minor); HRMS (ESI, positive) *m/z* calcd. for C<sub>19</sub>H<sub>24</sub>NO<sub>4</sub>P [M+H]<sup>+</sup> 362.1521; found 362.1527.

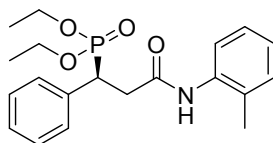

**(S)-diethyl (3-oxo-1-phenyl-3-(*o*-tolylamino)propyl)phosphonate (7e):** A white solid: yield 99%;  $[\alpha]_D^{24} = -22^\circ$  (*c* 0.3, CH<sub>3</sub>OH); <sup>1</sup>H NMR (400 MHz, CDCl<sub>3</sub>):  $\delta$  7.77 (s, 1H, NH), 7.46 (m, 3H, Ph), 7.31 (m, 4H, Ph), 7.08 (m, 3H, Ph), 4.07 (m, 2H, CH<sub>2</sub>), 3.81 (m, 2H, CH<sub>2</sub>), 3.62 (m, 1H, CH), 3.19 (m, 2H, CH<sub>2</sub>), 1.94 (s, 3H, CH<sub>3</sub>), 1.27 (d, *J* = 14.10 Hz, 3H, CH<sub>3</sub>), 0.99 (t, *J* = 14.00 Hz, 3H, CH<sub>3</sub>); <sup>13</sup>C NMR (100 MHz, CDCl<sub>3</sub>):  $\delta$  168.81, 135.70, 135.16, 131.41, 130.23, 129.36, 128.44, 127.38, 126.02, 125.40, 124.73, 63.12, 62.08, 41.15, 36.97, 17.55, 16.35; <sup>31</sup>P NMR (162 MHz, CDCl<sub>3</sub>):  $\delta$  27.68; 81% *ee*, HPLC: IA, 90% hexanes, 10% *i*PrOH, 1.0 mL/min, 13.4 min (major), 17.3 min (minor); HRMS (ESI, positive) *m/z* calcd. for C<sub>20</sub>H<sub>26</sub>NO<sub>4</sub>P [M+H]<sup>+</sup> 376.1678; found 376.1684.

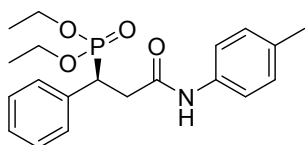

**(S)-diethyl (3-oxo-1-phenyl-3-(*p*-tolylamino)propyl)phosphonate (7f):** A white solid: yield 99%;  $[\alpha]_D^{24} = 28^\circ$  (*c* 0.4, CH<sub>3</sub>OH); <sup>1</sup>H NMR (400 MHz, CDCl<sub>3</sub>):  $\delta$  8.96 (s, 1H, NH), 7.46 (m, 2H, Ph), 7.33 (m, 4H, Ph), 7.22 (m, 1H, Ph), 7.00 (m, 2H, Ph), 4.11 (m, 2H, CH<sub>2</sub>), 3.89 (m, 2H, CH<sub>2</sub>), 3.63 (m, 1H, CH), 3.20 (m, 1H, CH), 2.23 (s, 3H, CH<sub>3</sub>), 1.27 (d, *J* = 14.10 Hz, 3H, CH<sub>3</sub>), 1.01 (t, *J* = 14.10 Hz, 3H, CH<sub>3</sub>); <sup>13</sup>C NMR (100 MHz, CDCl<sub>3</sub>):  $\delta$  167.71, 135.79, 134.94, 132.55, 128.86, 128.62, 128.11, 127.01, 119.08, 62.96, 61.68, 40.16, 36.92, 20.31, 15.94, 15.63; <sup>31</sup>P NMR (162 MHz, CDCl<sub>3</sub>):  $\delta$  28.59; 84% *ee*, HPLC: IA, 90% hexanes, 10% *i*PrOH, 1.0 mL/min, 11.1 min

(major), 15.1 min (minor); HRMS (ESI, positive)  $m/z$  calcd. for  $C_{20}H_{26}NO_4P$   $[M+H]^+$  376.1678; found 376.1689.

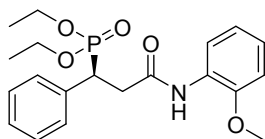

**(S)-diethyl (3-((2-methoxyphenyl)amino)-3-oxo-1-phenylpropyl)phosphonate (7g):** A white solid: yield 99%;  $[\alpha]_D^{24} = -42^\circ$  ( $c$  0.2,  $CH_3OH$ );  $^1H$  NMR (400 MHz,  $CDCl_3$ ):  $\delta$  7.76 (s, 1H, NH), 7.35 (m, 2H, Ph), 7.23 (m, 4H, Ph), 6.91 (m, 3H, Ph), 3.99 (m, 2H,  $CH_2$ ), 3.79 (m, 2H,  $CH_2$ ), 3.71 (s, 3H,  $CH_3$ ), 3.62 (m, 1H, CH), 3.13 (m, 1H, CH), 2.94 (m, 1H, CH), 1.19 (t,  $J = 13.84$  Hz, 3H,  $CH_3$ ), 0.99 (t,  $J = 13.80$  Hz, 3H,  $CH_3$ );  $^{13}C$  NMR (100 MHz,  $CDCl_3$ ):  $\delta$  167.28, 147.27, 134.97, 128.69, 128.63, 128.13, 126.92, 123.23, 120.38, 119.32, 109.39, 62.44, 61.57, 55.08, 40.55, 38.06, 15.79;  $^{31}P$  NMR (162 MHz,  $CDCl_3$ ):  $\delta$  27.85; 84% *ee*, HPLC: IA, 90% hexanes, 10%  $iPrOH$ , 1.0 mL/min, 14.8 min (major), 16.6 min (minor); HRMS (ESI, positive)  $m/z$  calcd. for  $C_{20}H_{26}NO_5P$   $[M+H]^+$  392.1627; found 392.1633.

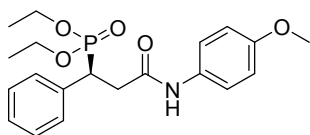

**(S)-diethyl (3-((4-methoxyphenyl)amino)-3-oxo-1-phenylpropyl)phosphonate (7h):** A white solid: yield 99%;  $[\alpha]_D^{24} = 32^\circ$  ( $c$  0.4,  $CH_3OH$ );  $^1H$  NMR (400 MHz,  $CDCl_3$ ):  $\delta$  9.44 (s, 1H, NH), 7.41 (m, 2H, Ph), 7.30 (m, 2H, Ph), 7.15 (m, 3H, Ph), 6.65 (m, 2H, Ph), 3.99 (m, 2H,  $CH_2$ ), 3.87 (m, 2H,  $CH_2$ ), 3.62 (s, 3H,  $CH_3$ ), 3.54 (m, 1H, CH), 3.19 (m, 2H,  $CH_2$ ), 1.21 (t,  $J = 14.00$  Hz, 3H,  $CH_3$ ), 0.941 (t,  $J = 13.80$  Hz, 3H,  $CH_3$ );  $^{13}C$  NMR (100 MHz,  $CDCl_3$ ):  $\delta$  167.61, 138.08, 130.24, 128.24, 123.27, 119.08, 115.18, 114.97, 63.00, 61.84, 39.39, 37.99, 37.17, 15.91, 15.72;  $^{31}P$  NMR (162 MHz,  $CDCl_3$ ):  $\delta$  28.61; 89% *ee*, HPLC: IA, 90% hexanes, 10%  $iPrOH$ , 1.0 mL/min, 16.5 min (major), 21.5 min (minor); HRMS (ESI, positive)  $m/z$  calcd. for  $C_{20}H_{26}NO_5P$   $[M+H]^+$  392.1627; found 392.1625.

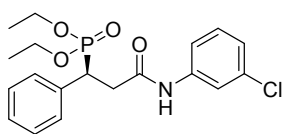

**(S)-diethyl (3-((3-chlorophenyl)amino)-3-oxo-1-phenylpropyl)phosphonate (7i):** A white solid: yield 99%;  $[\alpha]_D^{24} = 55^\circ$  ( $c$  0.3,  $CH_3OH$ );  $^1H$  NMR (400 MHz,  $CDCl_3$ ):  $\delta$  10.00 (s, 1H, NH), 7.45 (m, 4H, Ph), 7.22 (m, 3H, Ph), 7.01 (t,  $J = 14.08$  Hz, 1H, Ph), 6.86 (d,  $J = 8.00$  Hz, Ph), 4.04 (m, 2H,  $CH_2$ ), 3.92 (m, 1H, CH), 3.74 (m, 1H, CH), 3.55 (m, 1H, CH), 3.25 (m, 1H, CH), 1.24 (t,  $J = 14.12$  Hz, 3H,  $CH_3$ ), 0.96 (t,  $J = 14.12$  Hz, 3H,  $CH_3$ );  $^{13}C$  NMR (100 MHz,  $CDCl_3$ ):  $\delta$  168.09, 136.68, 134.54, 133.62, 129.20, 128.76, 128.70, 128.20, 128.17, 127.15, 63.27, 61.80, 39.88, 38.48, 36.70, 15.93;  $^{31}P$  NMR (162 MHz,  $CDCl_3$ ):  $\delta$  28.40; 81% *ee* HPLC: IA, 90% hexanes, 10%  $iPrOH$ , 1.0 mL/min, 14.3 min (major), 18.0 min (minor); HRMS (ESI, positive)  $m/z$  calcd. for  $C_{19}H_{23}ClNO_4P$   $[M+H]^+$  396.1131; found 396.1144.

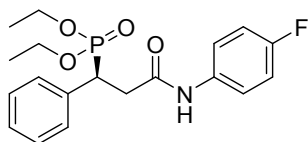

**(S)-diethyl (3-((4-fluorophenyl)amino)-3-oxo-1-phenylpropyl)phosphonate (7j):** A white solid: yield 98%;  $[\alpha]_{\text{D}}^{24} = 36^\circ$  (*c* 0.4, CH<sub>3</sub>OH); <sup>1</sup>H NMR (400 MHz, CDCl<sub>3</sub>):  $\delta$  9.30 (s, 1H, NH), 7.46 (m, 4H, Ph), 7.31 (m, 3H, Ph), 6.87 (t, *J* = 17.40 Hz, 2H, Ph), 4.07 (m, 2H, CH<sub>2</sub>), 3.91 (m, 2H, CH<sub>2</sub>), 3.63 (m, 1H, CH), 3.19 (m, 2H, CH), 1.27 (t, *J* = 14.12 Hz, 3H, CH<sub>3</sub>), 1.01 (t, *J* = 14.12 Hz, 3H, CH<sub>3</sub>); <sup>13</sup>C NMR (100 MHz, CDCl<sub>3</sub>):  $\delta$  167.81, 159.58, 157.17, 134.73, 134.49, 128.82, 128.14, 127.10, 120.70, 114.74, 114.52, 63.04, 61.78, 39.97, 36.71, 15.90, 0.53; <sup>31</sup>P NMR (162 MHz, CDCl<sub>3</sub>):  $\delta$  27.98; <sup>19</sup>F NMR (376 MHz, CDCl<sub>3</sub>):  $\delta$  -118.83; 83% *ee*, HPLC: IA, 90% hexanes, 10% <sup>i</sup>PrOH, 1.0 mL/min, 12.8 min (major), 16.1 min (minor); HRMS (ESI, positive) *m/z* calcd. for C<sub>19</sub>H<sub>23</sub>FNO<sub>4</sub>P [M+H]<sup>+</sup> 380.1427; found 380.1426.

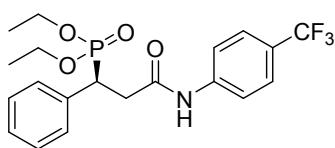

**(S)-diethyl (3-oxo-1-phenyl-3-((4-(trifluoromethyl)phenyl)amino)propyl)phosphonate (7k):** A white solid: yield 92%;  $[\alpha]_{\text{D}}^{24} = 34^\circ$  (*c* 0.4, CH<sub>3</sub>OH); <sup>1</sup>H NMR (400 MHz, CDCl<sub>3</sub>):  $\delta$  9.96 (s, 1H, NH), 7.60 (m, 2H, Ph), 7.41 (m, 4H, Ph), 7.31 (m, 3H, Ph), 4.11 (m, 2H, CH<sub>2</sub>), 3.97 (m, 2H, CH<sub>2</sub>), 3.63 (m, 1H, CH), 3.26 (m, 2H, CH), 1.29 (t, *J* = 14.12 Hz, 3H, CH<sub>3</sub>), 1.02 (t, *J* = 14.12 Hz, 3H, CH<sub>3</sub>); <sup>13</sup>C NMR (100 MHz, CDCl<sub>3</sub>):  $\delta$  167.49, 138.13, 137.04, 133.92, 129.33, 128.75, 128.23, 127.28, 127.09, 123.29, 119.10, 63.04, 62.01, 39.90, 38.51, 36.65, 15.85; <sup>31</sup>P NMR (162 MHz, CDCl<sub>3</sub>):  $\delta$  28.46; <sup>19</sup>F NMR (376 MHz, CDCl<sub>3</sub>):  $\delta$  -62.12; 77% *ee*, HPLC: IA, 90% hexanes, 10% <sup>i</sup>PrOH, 1.0 mL/min, 14.8 min (major), 17.8 min (minor); HRMS (ESI, positive) *m/z* calcd. for C<sub>20</sub>H<sub>23</sub>F<sub>3</sub>NO<sub>4</sub>P [M+H]<sup>+</sup> 430.1395; found 430.1396.

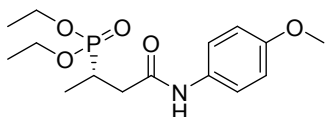

**(S)-diethyl (4-((4-methoxyphenyl)amino)-4-oxobutan-2-yl)phosphonate (7l):** A white solid: yield 98%;  $[\alpha]_{\text{D}}^{24} = 21^\circ$  (*c* 0.3, CH<sub>3</sub>OH); <sup>1</sup>H NMR (400 MHz, CDCl<sub>3</sub>):  $\delta$  9.28 (s, 1H, NH), 7.53 (m, 2H, Ph), 6.81 (m, 2H, Ph), 4.08 (m, 4H, CH<sub>2</sub>), 3.75 (s, 3H, CH<sub>3</sub>), 2.79 (m, 1H, CH), 2.51 (m, 2H, CH<sub>2</sub>), 1.27 (m, 12H, CH<sub>3</sub>); <sup>13</sup>C NMR (100 MHz, CDCl<sub>3</sub>):  $\delta$  168.17, 155.48, 131.48, 120.81, 113.42, 61.76, 61.68, 54.95, 37.05, 27.48, 26.05, 15.92, 13.03; <sup>31</sup>P NMR (162 MHz, CDCl<sub>3</sub>):  $\delta$  34.17; 61% *ee*, HPLC: IA, 95% hexanes, 5% <sup>i</sup>PrOH, 1.0 mL/min, 32.3 min (major), 35.3 min (minor); HRMS (ESI, positive) *m/z* calcd. for C<sub>15</sub>H<sub>24</sub>NO<sub>5</sub>P [M+H]<sup>+</sup> 330.1470; found 330.1478.

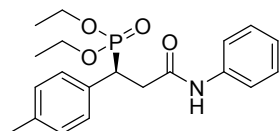

**(S)-diethyl (3-oxo-3-(phenylamino)-1-(*p*-tolyl)propyl)phosphonate (7m):** A white solid: yield 98%;  $[\alpha]_{\text{D}}^{24} = 21^\circ$  (*c* 0.3, CH<sub>3</sub>OH); <sup>1</sup>H NMR (400 MHz, CDCl<sub>3</sub>):  $\delta$  7.71 (s, 1H, NH), 7.47 (m, 3H, Ph), 7.31 (m, 3H, Ph), 7.10 (m, 3H, Ph), 4.07 (m, 2H, CH<sub>2</sub>), 3.85 (m, 3H, CH), 3.62 (m, 1H, CH), 3.20 (m, 2H, CH<sub>2</sub>), 1.94 (s, 3H, CH<sub>3</sub>), 1.27 (t, *J* = 14.12 Hz, 3H, CH<sub>3</sub>), 1.00 (t, *J* = 14.08 Hz, 3H, CH<sub>3</sub>);

$^{13}\text{C}$  NMR (100 MHz,  $\text{CDCl}_3$ ):  $\delta$  167.82, 138.31, 136.62, 131.70, 128.85, 128.62, 128.14, 123.07, 119.07, 62.88, 61.67, 39.71, 37.14, 20.61, 15.89;  $^{31}\text{P}$  NMR (162 MHz,  $\text{CDCl}_3$ ):  $\delta$  28.04; 83% *ee*, HPLC: IA, 90% hexanes, 10% *i*PrOH, 1.0 mL/min, 8.4 min (major), 17.8 min (minor); HRMS (ESI, positive)  $m/z$  calcd. for  $\text{C}_{20}\text{H}_{23}\text{NO}_4\text{P}$   $[\text{M}+\text{H}]^+$  376.1677; found 376.1676.

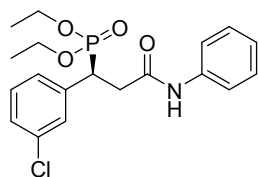

**(S)-diethyl (1-(3-chlorophenyl)-3-oxo-3-(phenylamino)propyl)phosphonate (7n):** A white solid: yield 98%;  $[\alpha]_{\text{D}}^{24} = 29^\circ$  (*c* 0.3,  $\text{CH}_3\text{OH}$ );  $^1\text{H}$  NMR (400 MHz,  $\text{CDCl}_3$ ):  $\delta$  10.01 (s, 1H, NH), 7.55 (m, 2H, Ph), 7.41 (m, 2H, Ph), 7.37 (m, 2H, Ph), 7.23 (m, 3H, Ph), 4.05 (m, 2H,  $\text{CH}_2$ ), 3.90 (m, 1H, CH), 3.76 (m, 1H, CH), 3.57 (m, 1H, CH), 3.25 (m, 2H,  $\text{CH}_2$ ), 1.24 (t,  $J = 14.00$  Hz, 3H,  $\text{CH}_3$ ), 0.97 (t,  $J = 14.00$  Hz, 3H,  $\text{CH}_3$ );  $^{13}\text{C}$  NMR (100 MHz,  $\text{CDCl}_3$ ):  $\delta$  168.29, 141.52, 134.63, 134.56, 128.76, 128.69, 128.21, 127.25, 125.38, 125.34, 118.58, 63.19, 61.79, 39.84, 36.93, 15.85;  $^{31}\text{P}$  NMR (162 MHz,  $\text{CDCl}_3$ ):  $\delta$  27.76; 81% *ee*, HPLC: IA, 90% hexanes, 10% *i*PrOH, 1.0 mL/min, 10.5 min (major), 11.8 min (minor); HRMS (ESI, positive)  $m/z$  calcd. for  $\text{C}_{19}\text{H}_{23}\text{ClNO}_4\text{P}$   $[\text{M}+\text{H}]^+$  396.1131; found 396.1143.

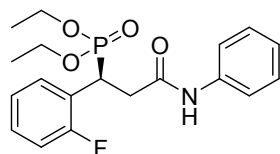

**(S)-diethyl (1-(2-fluorophenyl)-3-oxo-3-(phenylamino)propyl)phosphonate (7o):** A white solid: yield 98%;  $[\alpha]_{\text{D}}^{24} = 29^\circ$  (*c* 0.3,  $\text{CH}_3\text{OH}$ );  $^1\text{H}$  NMR (400 MHz,  $\text{CDCl}_3$ ):  $\delta$  9.14 (s, 1H, NH), 7.46 (m, 3H, Ph), 7.19 (m, 3H, Ph), 7.09 (m, 3H, Ph), 4.27 (m, 13H, CH), 4.11 (m, 2H,  $\text{CH}_2$ ), 3.90 (m, 1H, CH), 3.75 (m, 1H, CH), 3.24 (m, 2H,  $\text{CH}_2$ ), 1.28 (t,  $J = 14.12$  Hz, 3H,  $\text{CH}_3$ ), 1.06 (t,  $J = 14.08$  Hz, 3H,  $\text{CH}_3$ );  $^{13}\text{C}$  NMR (100 MHz,  $\text{CDCl}_3$ ):  $\delta$  167.64, 138.25, 129.25, 128.64, 128.17, 123.75, 123.14, 122.33, 119.07, 115.29, 62.84, 62.03, 35.88, 30.86, 15.87;  $^{31}\text{P}$  NMR (162 MHz,  $\text{CDCl}_3$ ):  $\delta$  27.53;  $^{19}\text{F}$  NMR (MHz,  $\text{CDCl}_3$ ):  $\delta$  -115.75; 73% *ee*, HPLC: IA, 90% hexanes, 10% *i*PrOH, 1.0 mL/min, 13.1 min (major), 15.1 min (minor); HRMS (ESI, positive)  $m/z$  calcd. for  $\text{C}_{19}\text{H}_{23}\text{FNO}_4\text{P}$   $[\text{M}+\text{H}]^+$  380.1427; found 380.1424.

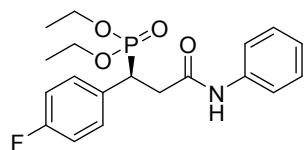

**(S)-diethyl (1-(4-fluorophenyl)-3-oxo-3-(phenylamino)propyl)phosphonate (7p):** A white solid: yield 96%;  $[\alpha]_{\text{D}}^{24} = 29^\circ$  (*c* 0.3,  $\text{CH}_3\text{OH}$ );  $^1\text{H}$  NMR (400 MHz,  $\text{CDCl}_3$ ):  $\delta$  9.23 (s, 1H, NH), 7.44 (m, 4H, Ph), 7.19 (m, 2H, Ph), 6.99 (m, 3H, Ph), 4.08 (m, 2H,  $\text{CH}_2$ ), 3.84 (m, 2H, CH), 3.64 (m, 1H, CH), 3.16 (m, 2H,  $\text{CH}_2$ ), 1.28 (t,  $J = 13.88$  Hz, 3H,  $\text{CH}_3$ ), 1.04 (t,  $J = 13.84$  Hz, 3H,  $\text{CH}_3$ );  $^{13}\text{C}$  NMR (100 MHz,  $\text{CDCl}_3$ ):  $\delta$  167.61, 138.04, 130.31, 130.24, 128.24, 123.33, 119.08, 115.19, 114.97, 63.00, 61.85, 39.39, 37.17, 15.91;  $^{31}\text{P}$  NMR (162 MHz,  $\text{CDCl}_3$ ):  $\delta$  27.87;  $^{19}\text{F}$  NMR (MHz,  $\text{CDCl}_3$ ):  $\delta$  -114.65; 87% *ee*, HPLC: IA, 90% hexanes, 10% *i*PrOH, 1.0 mL/min, 8.6 min (major), 17.9 min (minor); HRMS (ESI, positive)  $m/z$  calcd. for  $\text{C}_{19}\text{H}_{23}\text{FNO}_4\text{P}$   $[\text{M}+\text{H}]^+$  380.1427; found 380.1426.

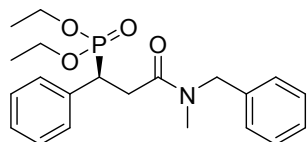

**(S)-diethyl (3-(benzyl(methyl)amino)-3-oxo-1-phenylpropyl)phosphonate (7q):** A white powder: yield 99%;  $[\alpha]_D^{24} = 12^\circ$  (*c* 0.4, CH<sub>3</sub>OH); <sup>1</sup>H NMR (400 MHz, CDCl<sub>3</sub>): δ 7.45 (m, 5H, Ph), 7.18 (m, 2H, Ph), 7.01 (m, 1H, Ph), 6.91 (m, 1H, Ph), 4.63 (m, 1H, CH), 4.33 (m, 1H, CH), 4.02 (m, 2H, CH<sub>2</sub>), 3.85 (m, 2H, CH<sub>2</sub>), 3.65 (m, 1H, CH), 3.06 (m, 2H, CH<sub>2</sub>), 2.87 (m, 3H, CH<sub>3</sub>), 1.29 (m, 3H, CH<sub>3</sub>), 1.04 (m, 3H, CH<sub>3</sub>); <sup>13</sup>C NMR (100 MHz, CDCl<sub>3</sub>): δ 169.64, 136.39, 135.73, 135.57, 128.90, 128.84, 128.36, 127.98, 127.16, 126.68, 125.73, 62.39, 61.39, 52.59, 50.47, 34.45, 33.29, 15.71. <sup>31</sup>P NMR (162 MHz, CDCl<sub>3</sub>): δ 28.71; 82% *ee*, HPLC: IA, 90% hexanes, 10% *i*PrOH, 1.0 mL/min, 17.5 min (major), 26.0 min (minor); HRMS (ESI, positive) *m/z* calcd. for C<sub>21</sub>H<sub>28</sub>NO<sub>4</sub>P [M+H]<sup>+</sup> 390.1834; found 390.1836.

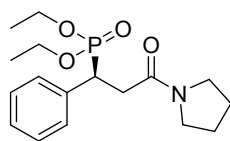

**(S)-diethyl (3-oxo-1-phenyl-3-(pyrrolidin-1-yl)propyl)phosphonate (7r):** Colorless oil: yield 98%;  $[\alpha]_D^{24} = -12^\circ$  (*c* 0.5, CH<sub>3</sub>OH); <sup>1</sup>H NMR (400 MHz, CDCl<sub>3</sub>): δ 7.41 (m, 2H, Ph), 7.21 (m, 2H, Ph), 7.20 (m, 2H, Ph), 4.06 (m, 2H, CH<sub>2</sub>), 3.90 (m, 2H, CH<sub>2</sub>), 3.71 (m, 1H, CH<sub>2</sub>), 3.46 (m, 2H, CH<sub>2</sub>), 3.29 (m, 2H, CH<sub>2</sub>), 2.93 (m, 2H, CH<sub>2</sub>), 1.77 (m, 4H, CH<sub>2</sub>), 1.27 (t, *J* = 14.00 Hz, 3H, CH<sub>3</sub>), 1.02 (t, *J* = 12.00 Hz, 3H, CH<sub>3</sub>); <sup>13</sup>C NMR (100 MHz, CDCl<sub>3</sub>): δ 167.71, 135.14, 128.77, 127.83, 126.58, 62.11, 61.23, 45.99, 45.09, 40.47, 39.92, 34.94, 25.40, 23.70, 15.84; <sup>31</sup>P NMR (162 MHz, CDCl<sub>3</sub>): δ 28.57; 83% *ee*, HPLC: IB, 90% hexanes, 10% *i*PrOH, 1.0 mL/min, 14.3 min (major), 20.2 min (minor); HRMS (ESI, positive) *m/z* calcd. for C<sub>17</sub>H<sub>26</sub>NO<sub>4</sub>P [M+H]<sup>+</sup> 340.1677; found 340.1670.

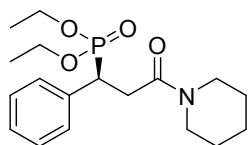

**(S)-diethyl (3-oxo-1-phenyl-3-(piperidin-1-yl)propyl)phosphonate (7s):** Colorless oil: yield 95%;  $[\alpha]_D^{24} = -11^\circ$  (*c* 0.3, CH<sub>3</sub>OH); <sup>1</sup>H NMR (400 MHz, CDCl<sub>3</sub>): δ 7.40 (m, 2H, Ph), 7.29 (m, 2H, Ph), 7.22 (m, 1H, Ph), 4.20 (m, 1H, CH), 4.07 (m, 2H, CH<sub>2</sub>), 3.85 (m, 2H, CH<sub>2</sub>), 3.64 (m, 1H, CH), 3.37 (m, 4H, CH<sub>2</sub>), 3.03 (m, 2H, CH<sub>2</sub>), 1.54 (m, 4H, CH<sub>2</sub>), 1.36 (m, 1H, CH), 1.30 (t, *J* = 14.16 Hz, 3H, CH<sub>3</sub>), 1.05 (t, *J* = 14.16 Hz, 3H, CH<sub>3</sub>); <sup>13</sup>C NMR (100 MHz, CDCl<sub>3</sub>): δ 167.53, 135.64, 128.73, 127.89, 126.65, 62.38, 61.40, 46.09, 42.52, 40.47, 32.98, 25.08, 24.93, 23.89, 15.88; <sup>31</sup>P NMR (162 MHz, CDCl<sub>3</sub>): δ 28.52; 81% *ee*, HPLC: IA, 90% hexanes, 10% *i*PrOH, 1.0 mL/min, 12.1 min (major), 17.7 min (minor); HRMS (ESI, positive) *m/z* calcd. for C<sub>20</sub>H<sub>26</sub>NO<sub>4</sub>P [M+H]<sup>+</sup> 354.1834.1834; found 354.1832.

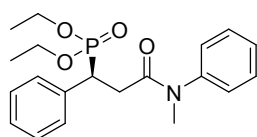

**(S)-diethyl (3-(methyl(phenyl)amino)-3-oxo-1-phenylpropyl)phosphonate (7t):** A white

powder: yield 99%;  $[\alpha]_D^{24} = 13^\circ$  ( $c$  0.3, CH<sub>3</sub>OH); <sup>1</sup>H NMR (400 MHz, CDCl<sub>3</sub>):  $\delta$  7.39 (m, 3H, Ph), 7.26 (m, 5H, Ph), 6.98 (m, 2H, Ph), 3.99 (m, 2H, CH<sub>2</sub>), 3.85 (m, 2H, CH<sub>2</sub>), 3.62 (m, 1H, CH), 3.13 (s, 3H, CH<sub>3</sub>), 2.74 (m, 2H, CH<sub>2</sub>), 1.24 (t,  $J = 11.80$ , 3H, CH<sub>3</sub>), 1.00 (t,  $J = 12.64$  Hz, 3H, CH<sub>3</sub>); <sup>13</sup>C NMR (100 MHz, CDCl<sub>3</sub>):  $\delta$  169.40, 142.88, 135.27, 129.34, 128.80, 127.84, 127.52, 126.81, 126.70, 62.22, 61.28, 40.76, 39.36, 34.08, 15.62; <sup>31</sup>P NMR (162 MHz, CDCl<sub>3</sub>):  $\delta$  28.22; 80% *ee*, HPLC: IA, 90% hexanes, 10% *i*PrOH, 1.0 mL/min, 12.2 min (major), 13.5 min (minor); HRMS (ESI, positive)  $m/z$  calcd. for C<sub>20</sub>H<sub>26</sub>NO<sub>4</sub>P [M+H]<sup>+</sup> 376.1678; found 376.1691.

The  $^1\text{H}$ ,  $^{13}\text{C}$ ,  $^{31}\text{P}$  NMR spectra and HPLC spectrum of compound **7a**

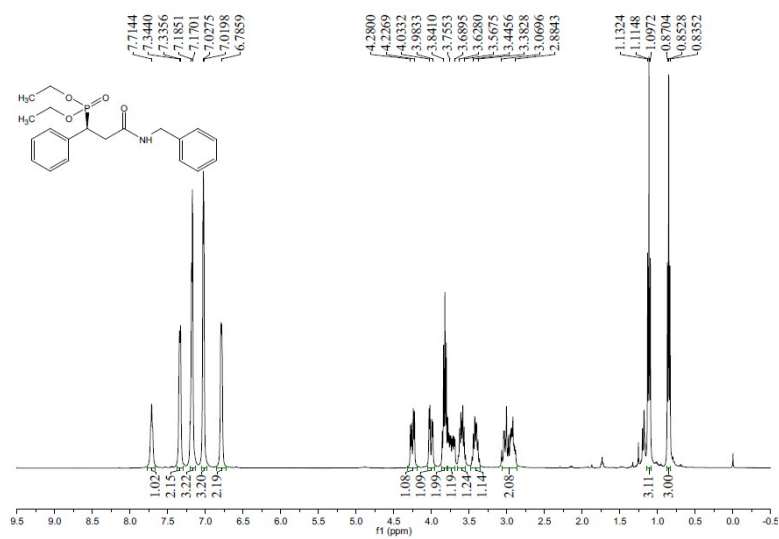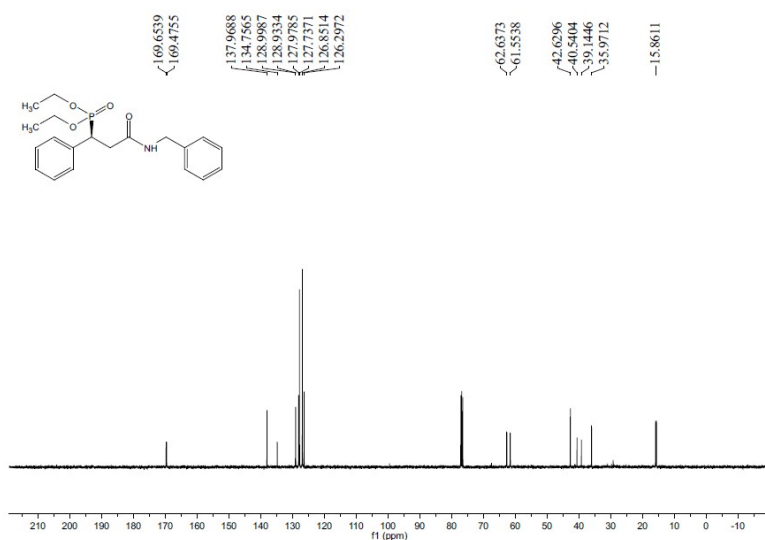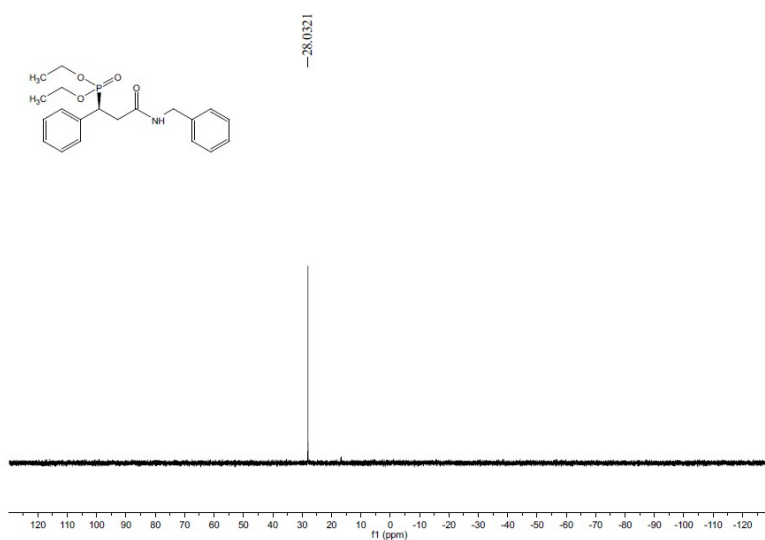

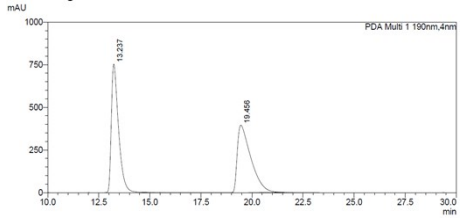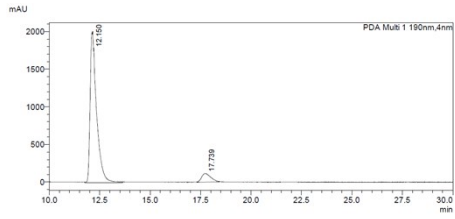

**<Peak Table>**

| PDA Ch1 190nm |           |          |         |         |
|---------------|-----------|----------|---------|---------|
| Peak#         | Ret. Time | Area     | Height  | Area%   |
| 1             | 13.237    | 18754291 | 756127  | 50.665  |
| 2             | 19.456    | 18261859 | 396363  | 49.335  |
| Total         |           | 37016150 | 1152491 | 100.000 |

**<Peak Table>**

| PDA Ch1 190nm |           |          |         |         |
|---------------|-----------|----------|---------|---------|
| Peak#         | Ret. Time | Area     | Height  | Area%   |
| 1             | 12.150    | 44417129 | 2012266 | 92.432  |
| 2             | 17.739    | 3636701  | 114843  | 7.568   |
| Total         |           | 48053830 | 2127109 | 100.000 |



The  $^1\text{H}$ ,  $^{13}\text{C}$ ,  $^{31}\text{P}$  NMR spectra and HPLC spectrum of compound **7b**

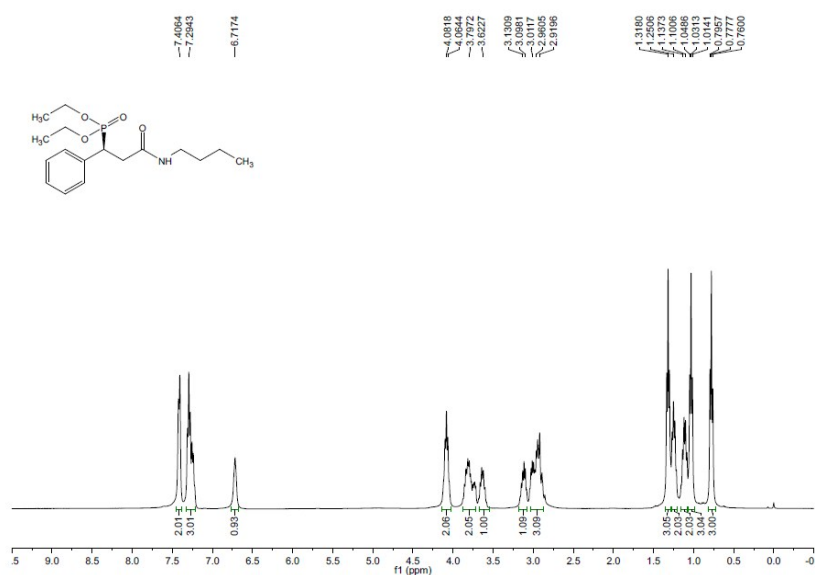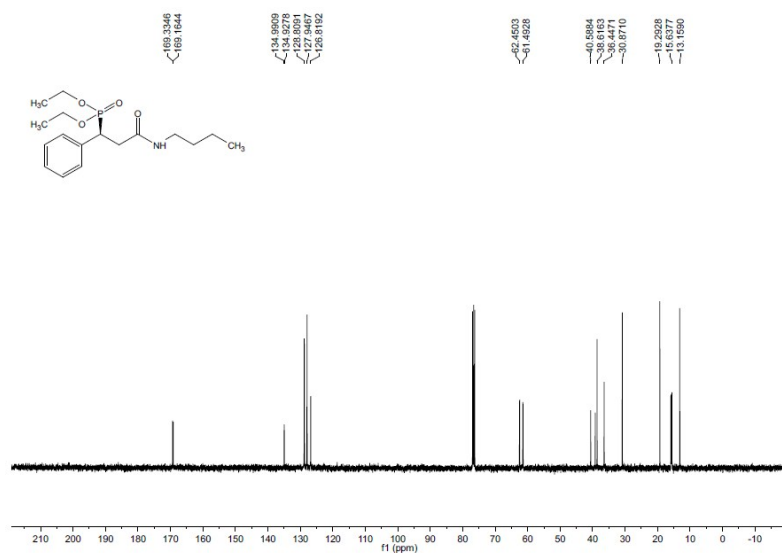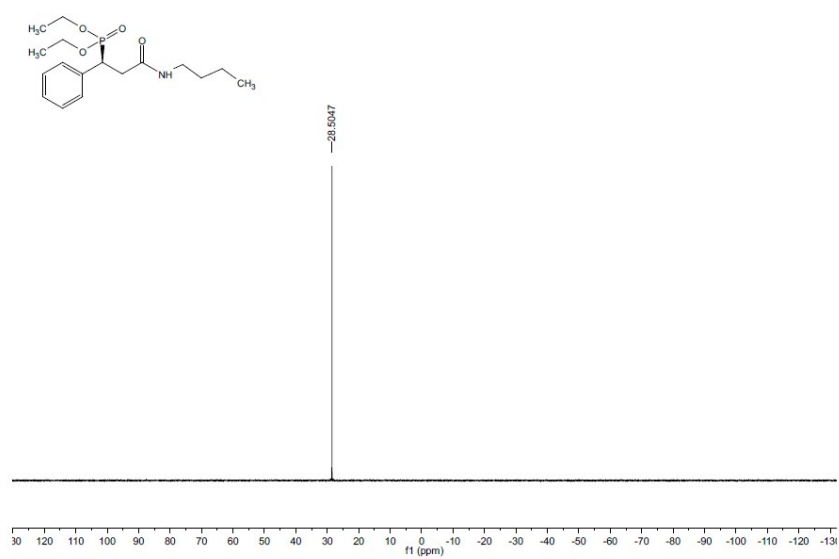

<Chromatogram>

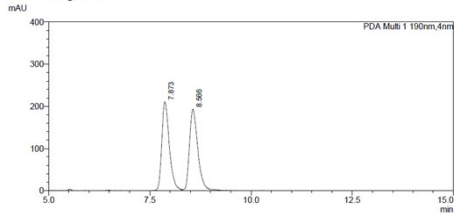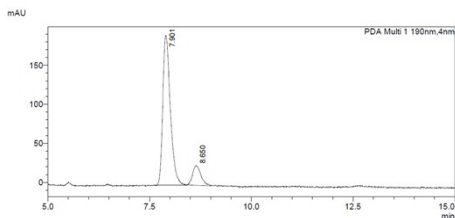

<Peak Table>

| PDA Ch1 190nm |           |         |        |         |
|---------------|-----------|---------|--------|---------|
| Peak#         | Ret. Time | Area    | Height | Area%   |
| 1             | 7.873     | 2767793 | 211621 | 49.352  |
| 2             | 8.566     | 2840521 | 194689 | 50.648  |
| Total         |           | 5608314 | 406310 | 100.000 |

<Peak Table>

| PDA Ch1 190nm |           |         |        |         |
|---------------|-----------|---------|--------|---------|
| Peak#         | Ret. Time | Area    | Height | Area%   |
| 1             | 7.901     | 2476822 | 191862 | 87.293  |
| 2             | 8.650     | 360560  | 25214  | 12.707  |
| Total         |           | 2837382 | 217076 | 100.000 |

The  $^1\text{H}$ ,  $^{13}\text{C}$ ,  $^{31}\text{P}$  NMR spectra and HPLC spectrum of compound **7c**

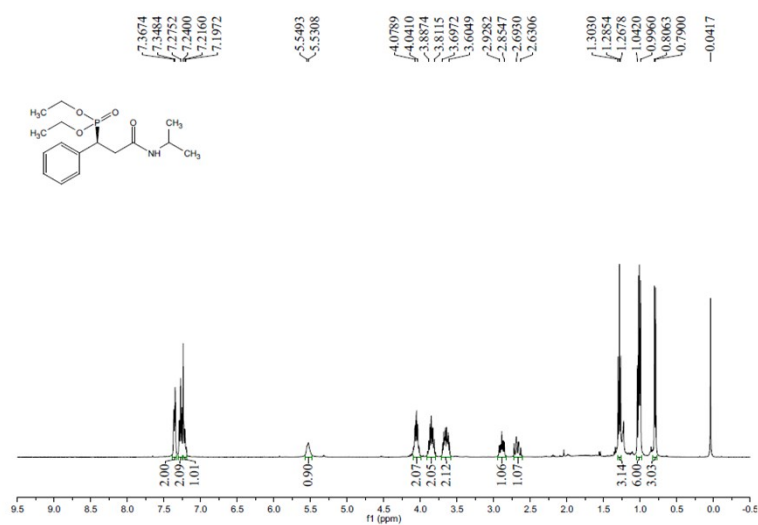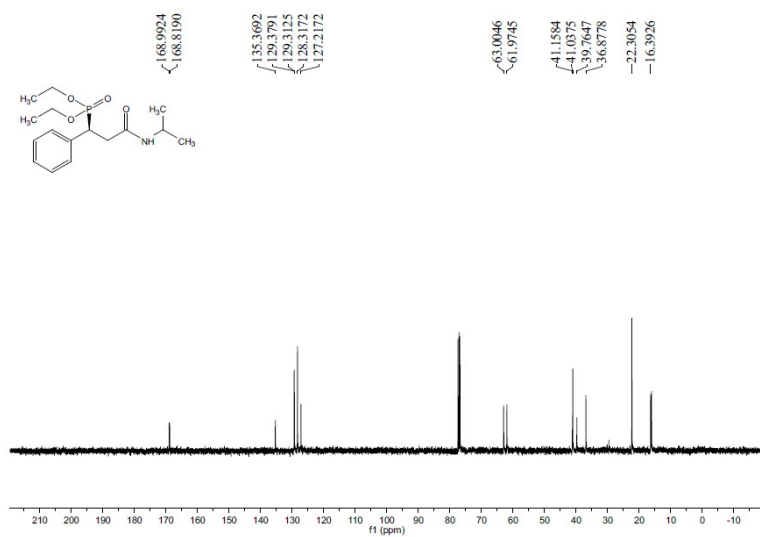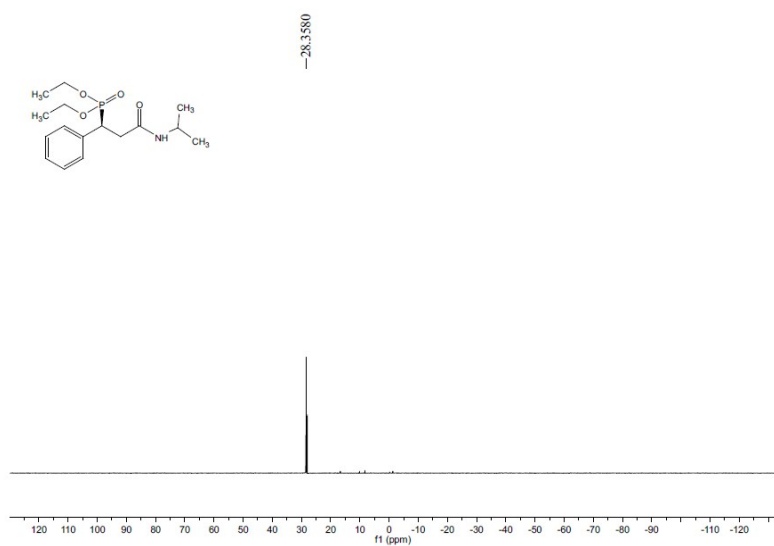

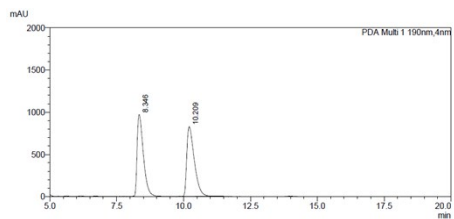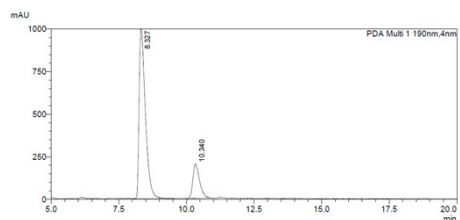

**<Peak Table>**

PDA Ch1 190nm

| Peak# | Ret. Time | Area     | Height  | Area%   |
|-------|-----------|----------|---------|---------|
| 1     | 8.346     | 15749529 | 970693  | 49.493  |
| 2     | 10.209    | 16072338 | 827254  | 50.507  |
| Total |           | 31821867 | 1797947 | 100.000 |

**<Peak Table>**

PDA Ch1 190nm

| Peak# | Ret. Time | Area     | Height  | Area%   |
|-------|-----------|----------|---------|---------|
| 1     | 8.327     | 16058262 | 995204  | 82.370  |
| 2     | 10.340    | 3437024  | 201272  | 17.630  |
| Total |           | 19495287 | 1196476 | 100.000 |

The  $^1\text{H}$ ,  $^{13}\text{C}$ ,  $^{31}\text{P}$  NMR spectra and HPLC spectrum of compound **7d**

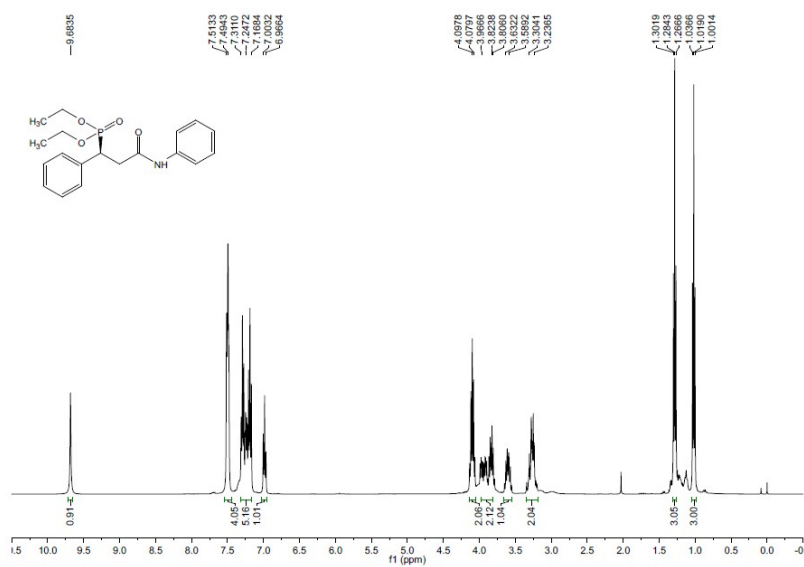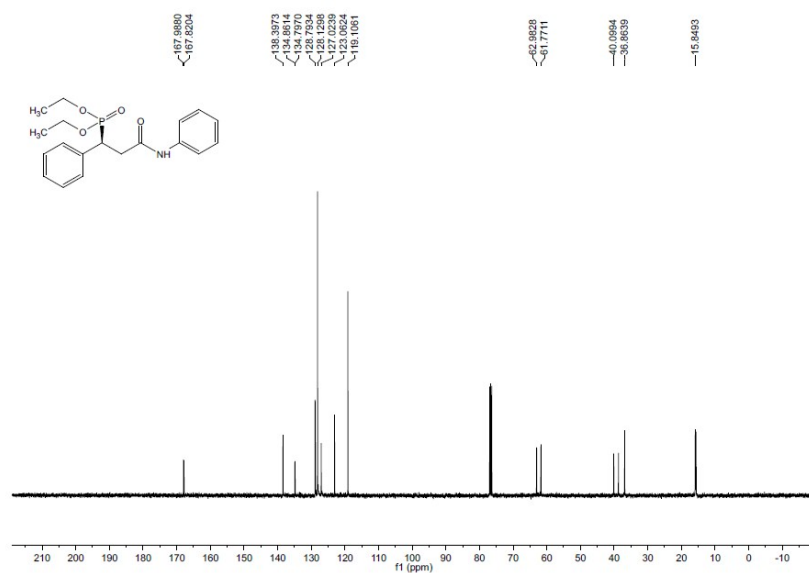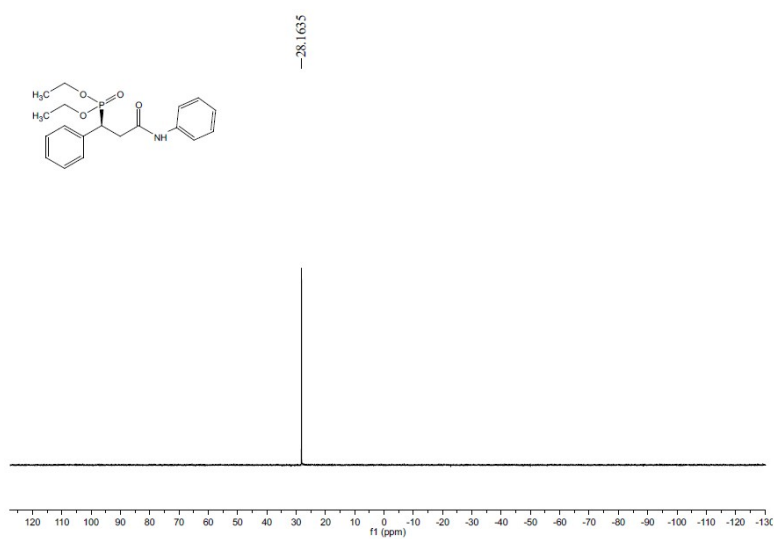

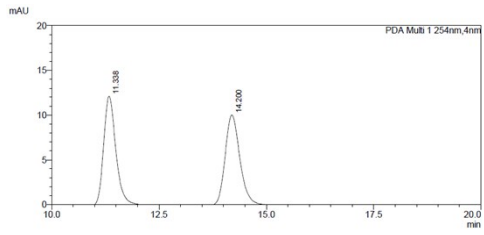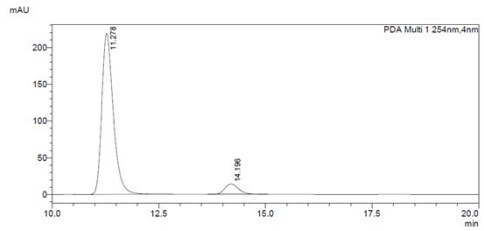

**<Peak Table>**

| PDA Ch1 254nm |           |        |        |         |
|---------------|-----------|--------|--------|---------|
| Peak#         | Ret. Time | Area   | Height | Area%   |
| 1             | 11.338    | 245232 | 12227  | 50.001  |
| 2             | 14.200    | 245226 | 10126  | 49.999  |
| Total         |           | 490458 | 22353  | 100.000 |

**<Peak Table>**

| PDA Ch1 254nm |           |         |        |         |
|---------------|-----------|---------|--------|---------|
| Peak#         | Ret. Time | Area    | Height | Area%   |
| 1             | 11.278    | 4091396 | 218525 | 92.499  |
| 2             | 14.196    | 331795  | 14287  | 7.501   |
| Total         |           | 4423191 | 232813 | 100.000 |

The  $^1\text{H}$ ,  $^{13}\text{C}$ ,  $^{31}\text{P}$  NMR spectra and HPLC spectrum of compound **7e**

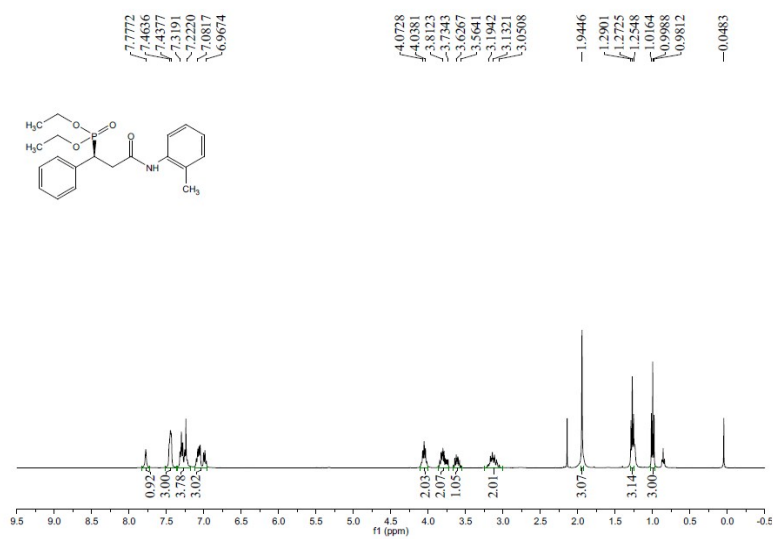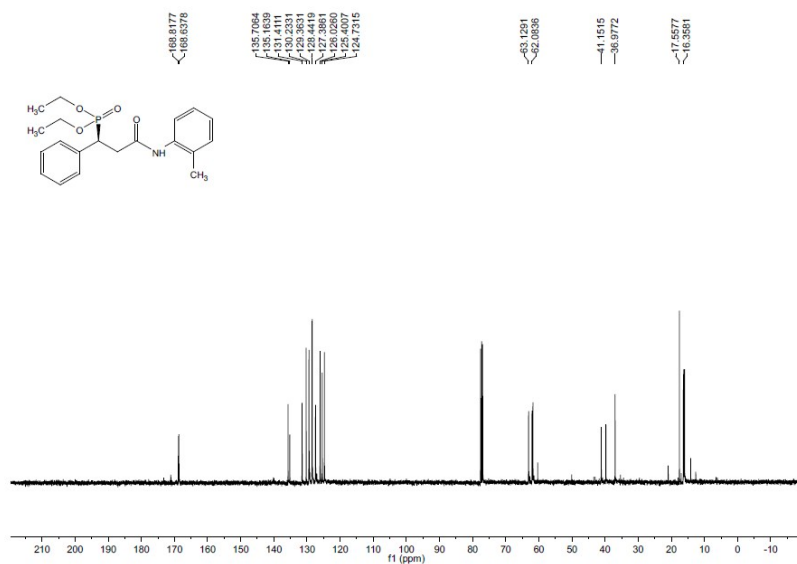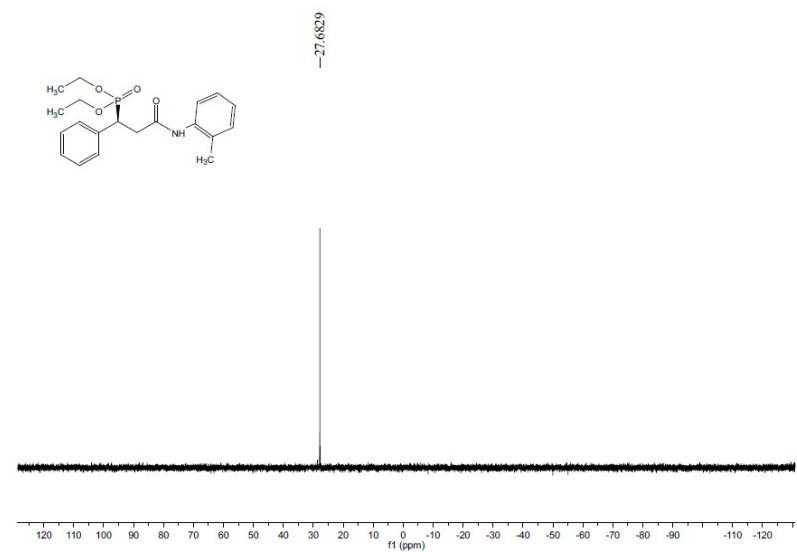

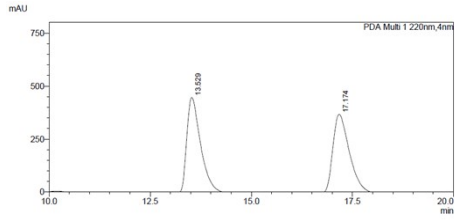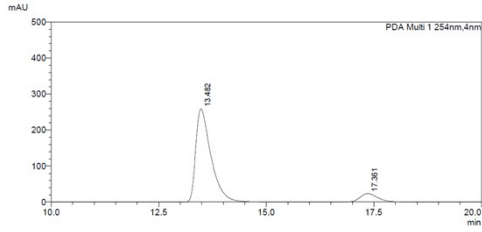

**<Peak Table>**

| PDA Ch1 220nm |           |          |        |         |
|---------------|-----------|----------|--------|---------|
| Peak#         | Ret. Time | Area     | Height | Area%   |
| 1             | 13.529    | 10988786 | 454221 | 50.071  |
| 2             | 17.174    | 10957694 | 376720 | 49.929  |
| Total         |           | 21946480 | 830941 | 100.000 |

**<Peak Table>**

| PDA Ch1 254nm |           |         |        |         |
|---------------|-----------|---------|--------|---------|
| Peak#         | Ret. Time | Area    | Height | Area%   |
| 1             | 13.482    | 6389968 | 259291 | 90.380  |
| 2             | 17.361    | 680149  | 23571  | 9.620   |
| Total         |           | 7070117 | 282862 | 100.000 |



The  $^1\text{H}$ ,  $^{13}\text{C}$ ,  $^{31}\text{P}$  NMR spectra and HPLC spectrum of compound **7f**

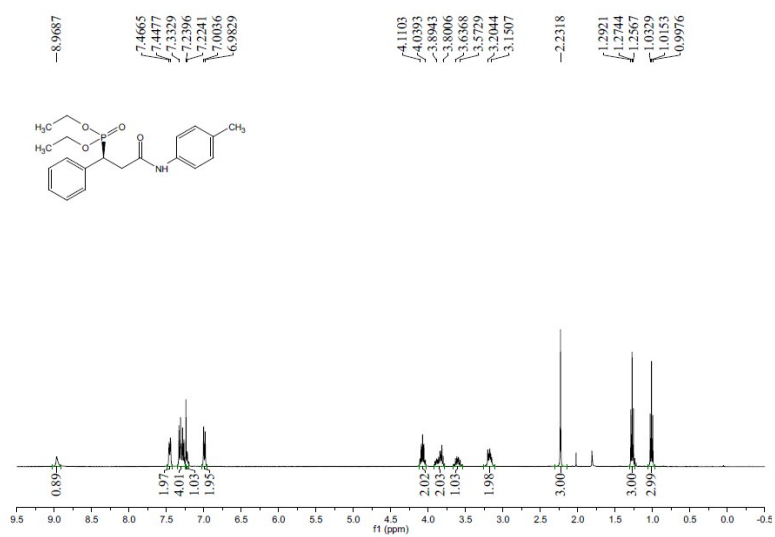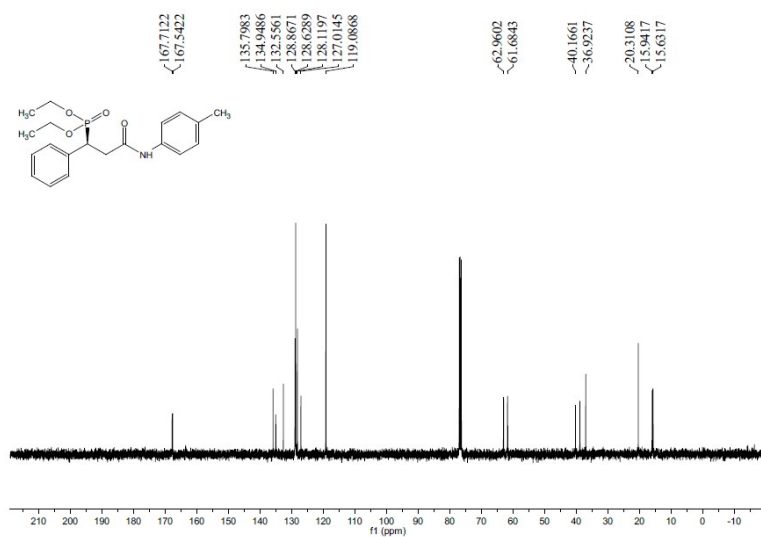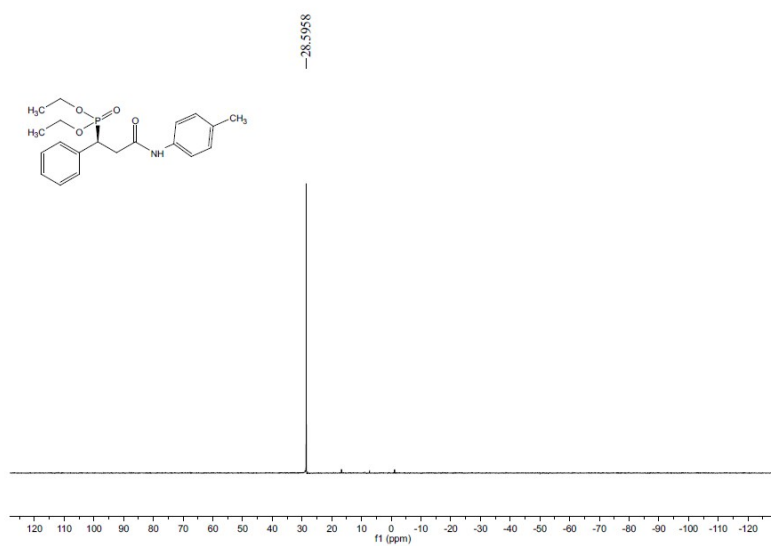

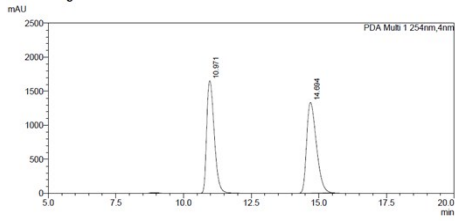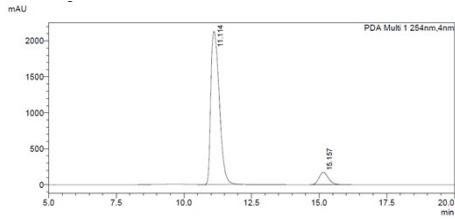

**<Peak Table>**

| Peak# | Ret. Time | Area     | Height  | Area%   |
|-------|-----------|----------|---------|---------|
| 1     | 10.971    | 32233860 | 1653709 | 49.053  |
| 2     | 14.694    | 33478552 | 1334206 | 50.947  |
| Total |           | 65712412 | 2987915 | 100.000 |

**<Peak Table>**

| Peak# | Ret. Time | Area     | Height  | Area%   |
|-------|-----------|----------|---------|---------|
| 1     | 11.114    | 46793676 | 2126617 | 92.004  |
| 2     | 15.157    | 4066915  | 170506  | 7.996   |
| Total |           | 50860590 | 2297123 | 100.000 |

The  $^1\text{H}$ ,  $^{13}\text{C}$ ,  $^{31}\text{P}$  NMR spectra and HPLC spectrum of compound **7g**

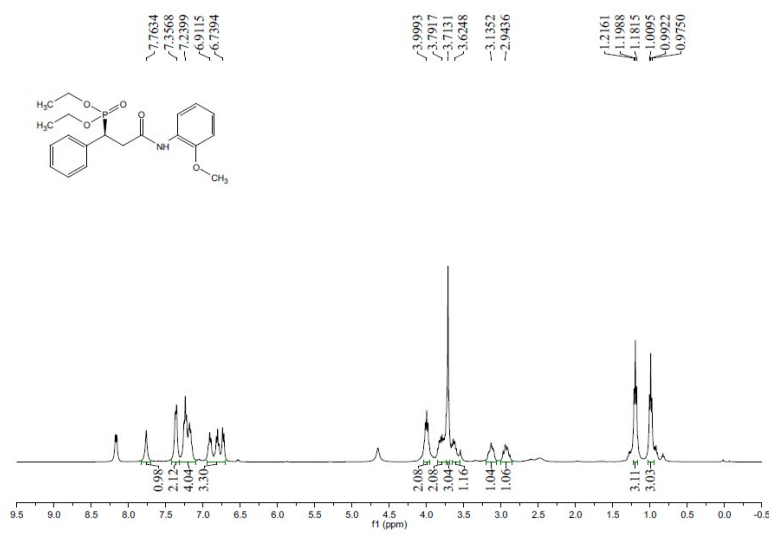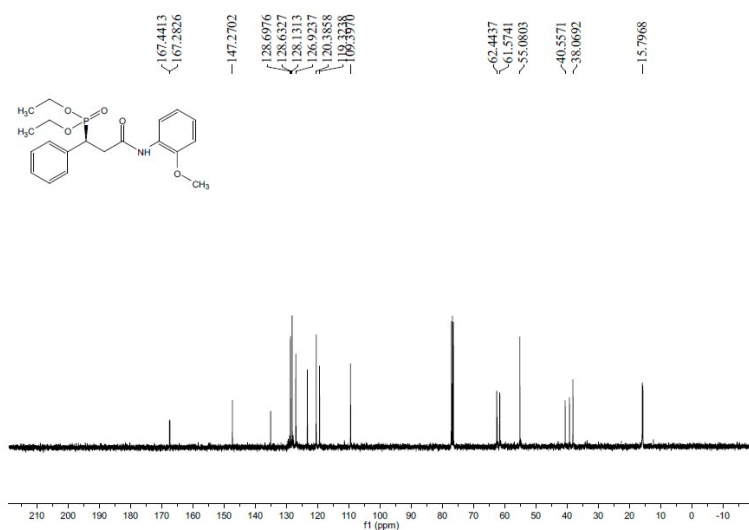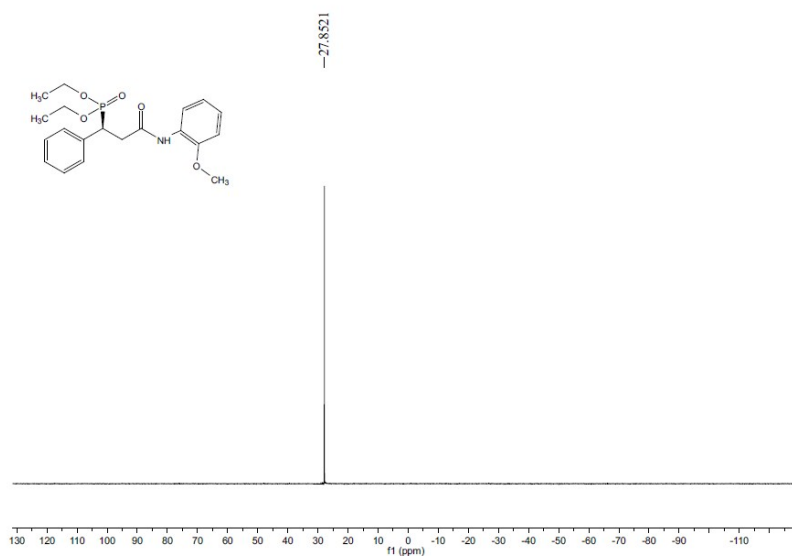

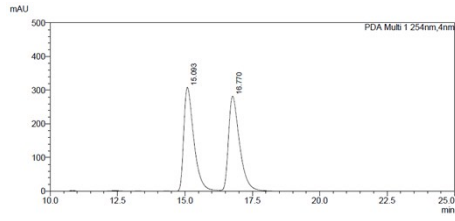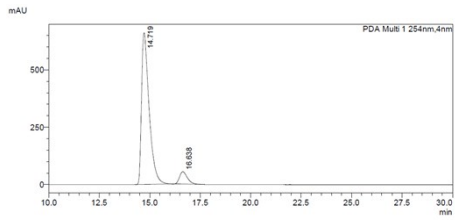

**<Peak Table>**

| PDA Ch1 254nm |           |          |        |         |
|---------------|-----------|----------|--------|---------|
| Peak#         | Ret. Time | Area     | Height | Area%   |
| 1             | 15.093    | 8075670  | 309046 | 49.894  |
| 2             | 16.770    | 8110131  | 282406 | 50.106  |
| Total         |           | 16185801 | 591452 | 100.000 |

**<Peak Table>**

| PDA Ch1 254nm |           |          |        |         |
|---------------|-----------|----------|--------|---------|
| Peak#         | Ret. Time | Area     | Height | Area%   |
| 1             | 14.719    | 17279210 | 661482 | 92.320  |
| 2             | 16.638    | 1437375  | 53621  | 7.680   |
| Total         |           | 18716585 | 715102 | 100.000 |

The  $^1\text{H}$ ,  $^{13}\text{C}$ ,  $^{31}\text{P}$  NMR spectra and HPLC spectrum of compound **7h**

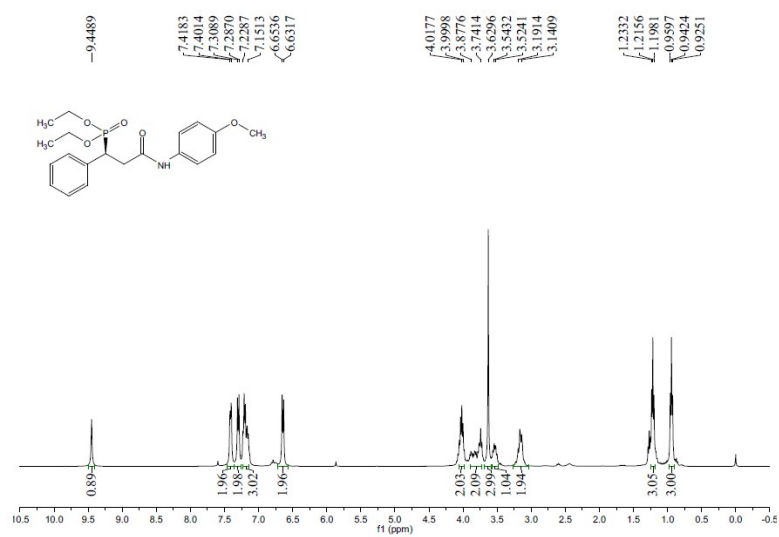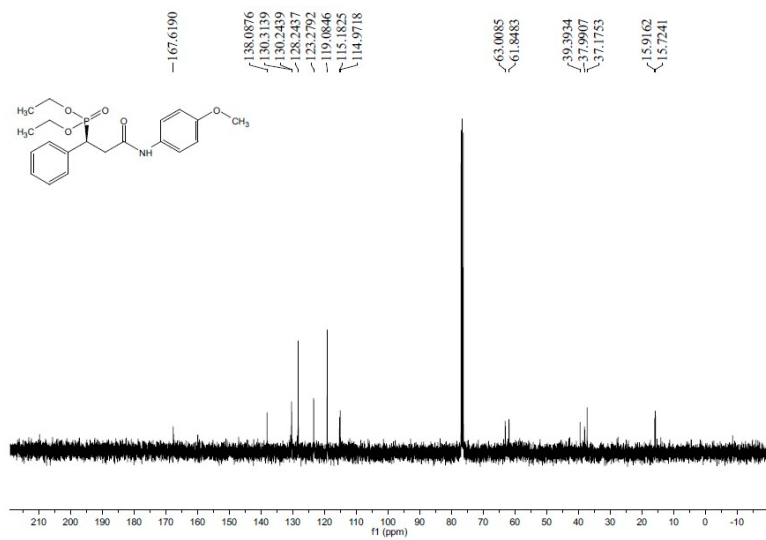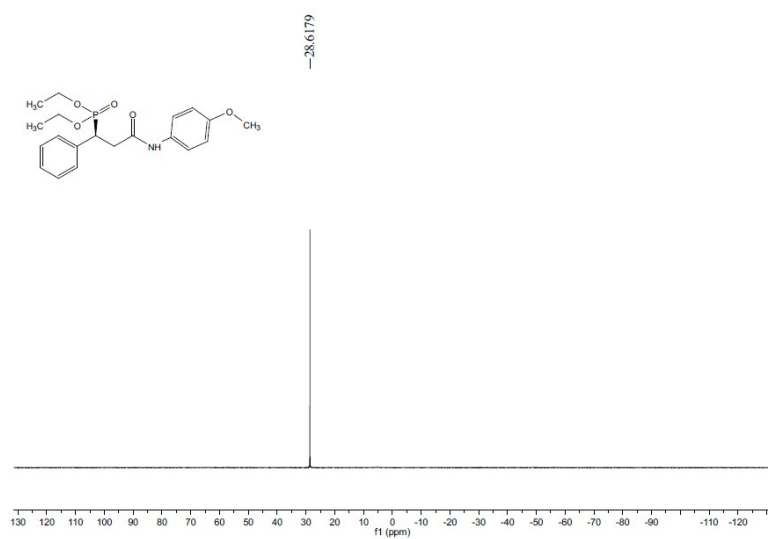

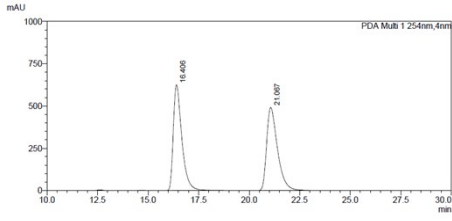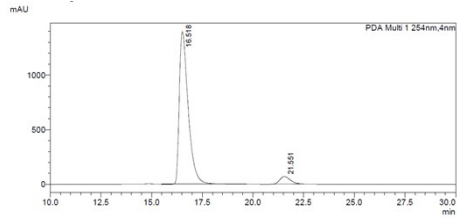

**<Peak Table>**

| PDA Ch1 254nm |           |          |         |         |
|---------------|-----------|----------|---------|---------|
| Peak#         | Ret. Time | Area     | Height  | Area%   |
| 1             | 16.406    | 18320092 | 624710  | 50.162  |
| 2             | 21.067    | 18201600 | 490926  | 49.838  |
| Total         |           | 36521692 | 1115636 | 100.000 |

**<Peak Table>**

| PDA Ch1 254nm |           |          |         |         |
|---------------|-----------|----------|---------|---------|
| Peak#         | Ret. Time | Area     | Height  | Area%   |
| 1             | 16.518    | 42674289 | 1397341 | 94.459  |
| 2             | 21.551    | 2503483  | 69881   | 5.541   |
| Total         |           | 45177772 | 1467221 | 100.000 |

The  $^1\text{H}$ ,  $^{13}\text{C}$ ,  $^{31}\text{P}$  NMR spectra and HPLC spectrum of compound **7i**

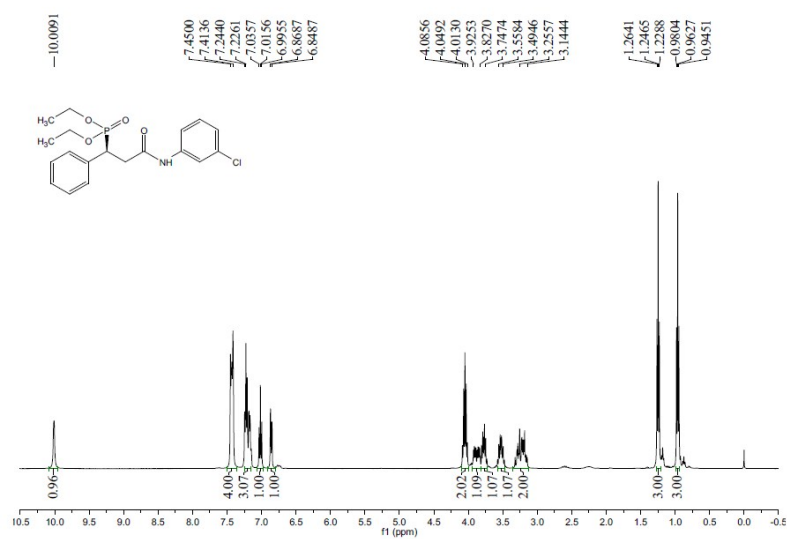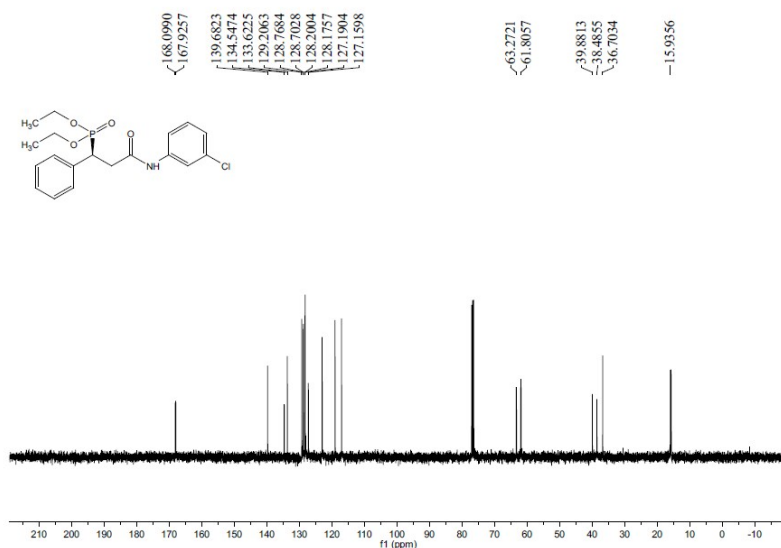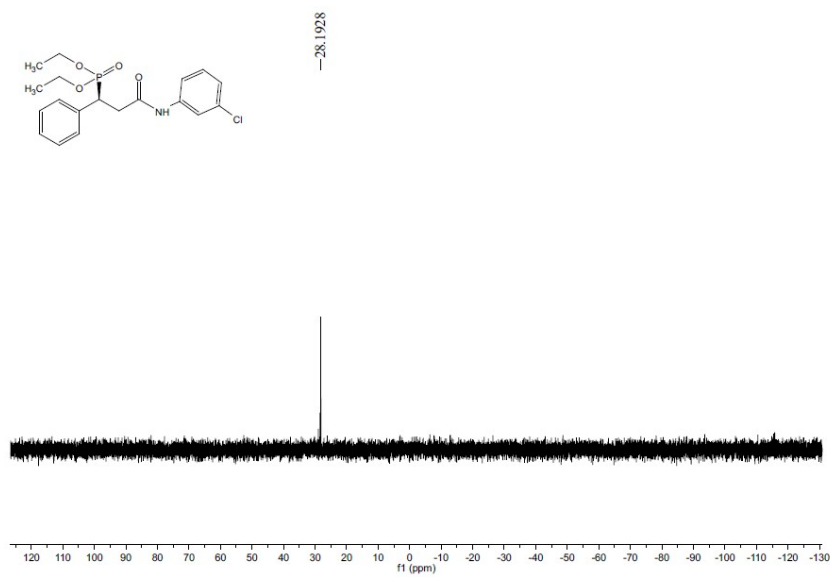

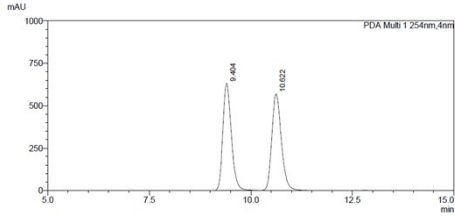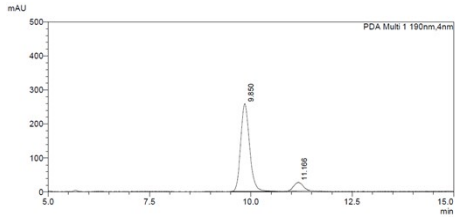

<Peak Table>

| PDA Ch1 254nm |           |          |         |         |
|---------------|-----------|----------|---------|---------|
| Peak#         | Ret. Time | Area     | Height  | Area%   |
| 1             | 9.404     | 9168567  | 632358  | 49.698  |
| 2             | 10.622    | 9280109  | 568753  | 50.302  |
| Total         |           | 18448675 | 1201111 | 100.000 |

<Peak Table>

| PDA Ch1 190nm |           |         |        |         |
|---------------|-----------|---------|--------|---------|
| Peak#         | Ret. Time | Area    | Height | Area%   |
| 1             | 9.850     | 3960781 | 258539 | 90.991  |
| 2             | 11.166    | 392137  | 25305  | 9.009   |
| Total         |           | 4352918 | 283844 | 100.000 |



The  $^1\text{H}$ ,  $^{13}\text{C}$ ,  $^{31}\text{P}$ ,  $^{19}\text{F}$  NMR spectra and HPLC spectrum of compound **7j**

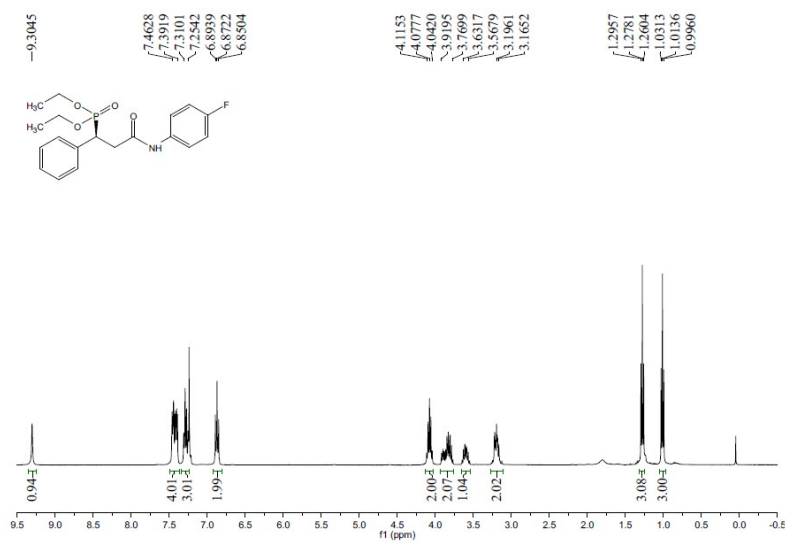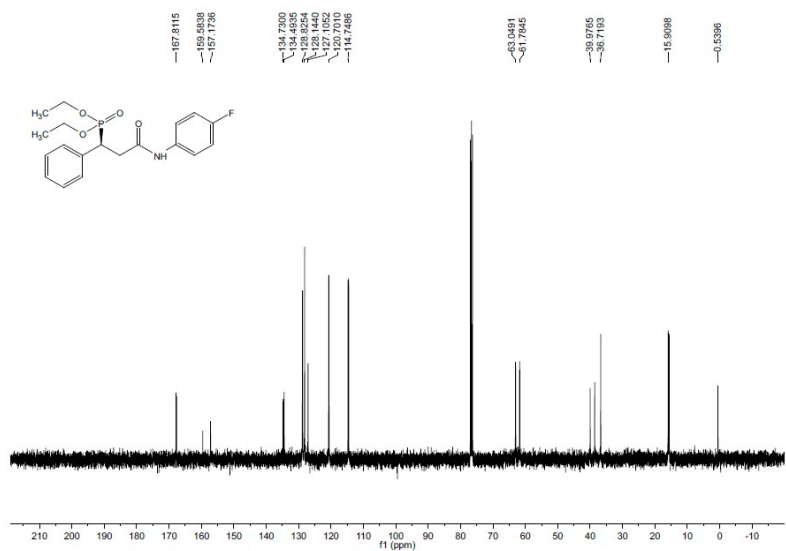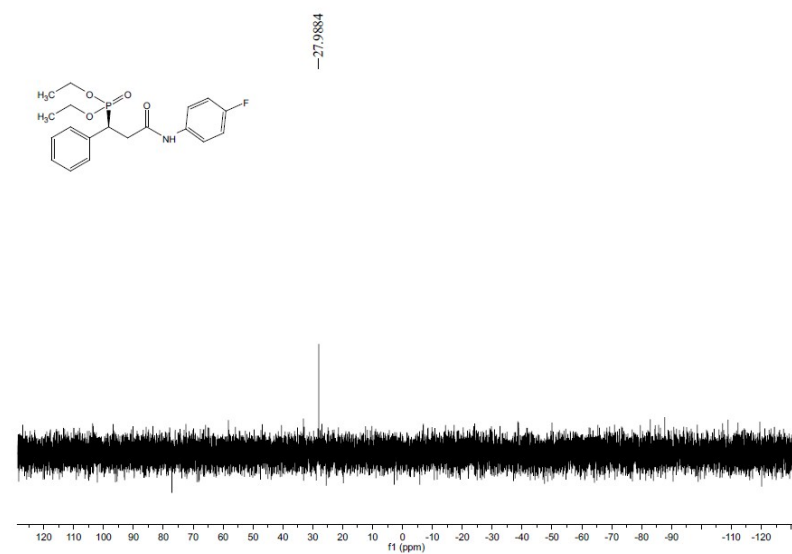

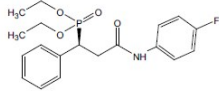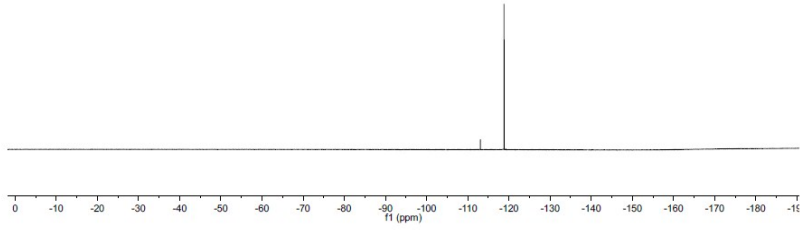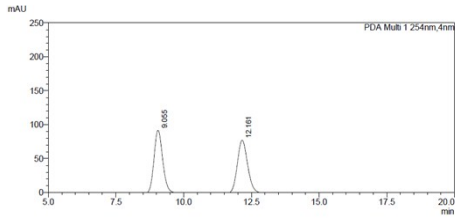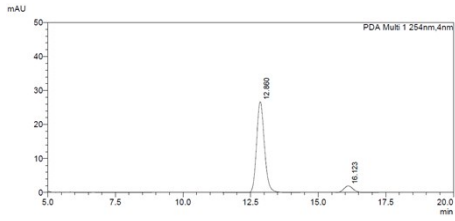

**<Peak Table>**

PDA Ch1 254nm

| Peak# | Ret. Time | Area    | Height | Area%   |
|-------|-----------|---------|--------|---------|
| 1     | 9.055     | 2108739 | 93287  | 49.939  |
| 2     | 12.161    | 2113896 | 78597  | 50.061  |
| Total |           | 4222635 | 171885 | 100.000 |

**<Peak Table>**

PDA Ch1 254nm

| Peak# | Ret. Time | Area   | Height | Area%   |
|-------|-----------|--------|--------|---------|
| 1     | 12.860    | 540350 | 26782  | 91.641  |
| 2     | 16.123    | 49290  | 2013   | 8.359   |
| Total |           | 589640 | 28795  | 100.000 |

The  $^1\text{H}$ ,  $^{13}\text{C}$ ,  $^{31}\text{P}$ ,  $^{19}\text{F}$  NMR spectra and HPLC spectrum of compound **7k**

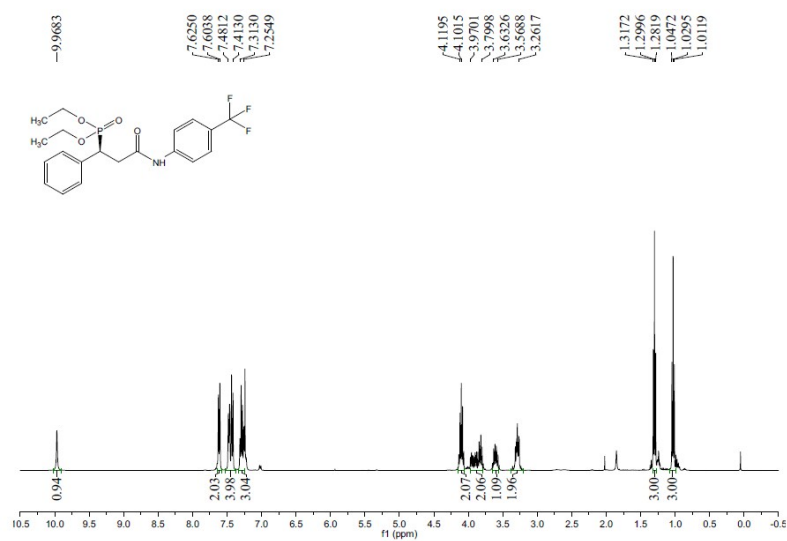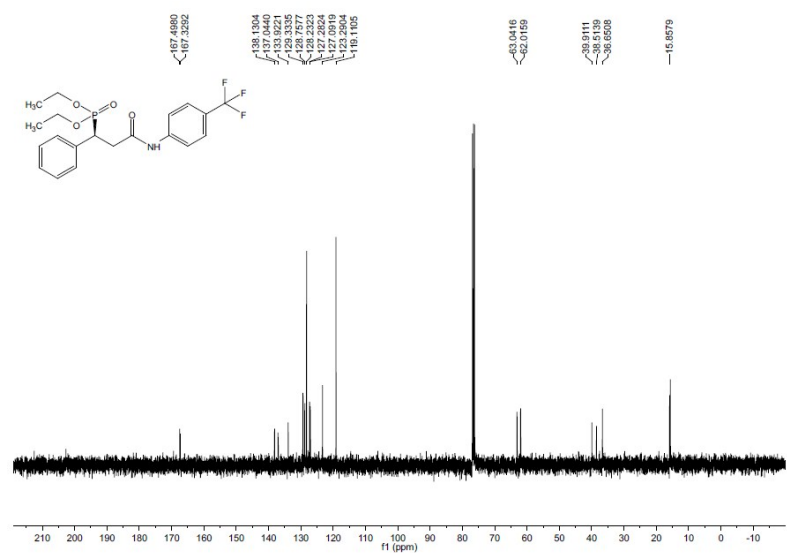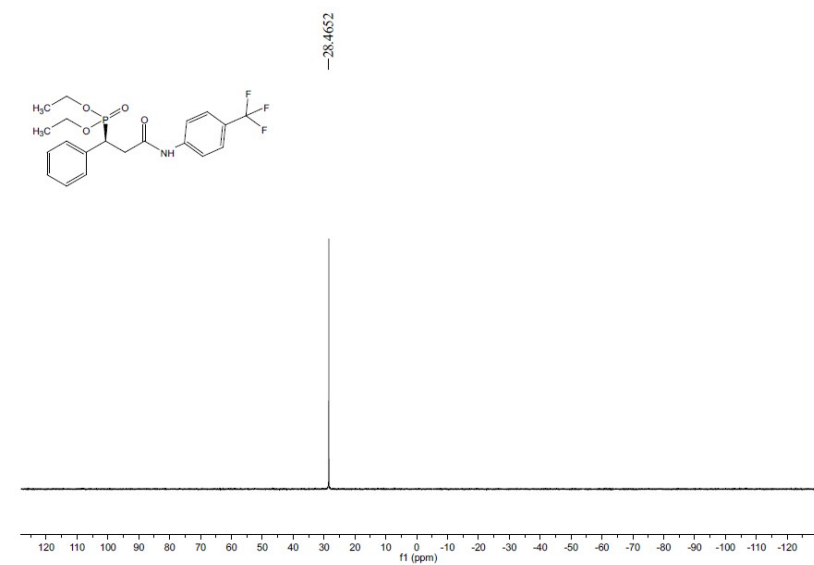

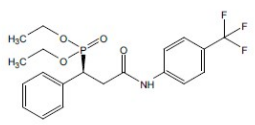

—62.1251

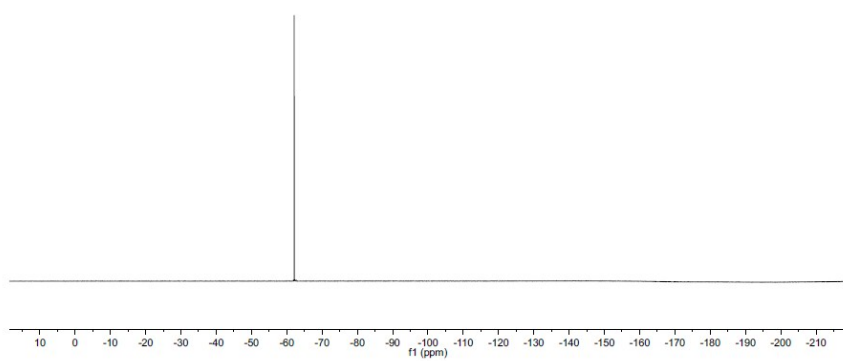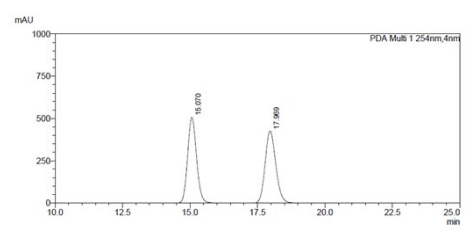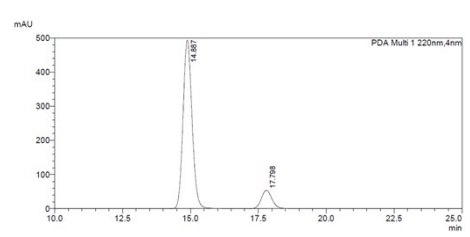

<Peak Table>

| PDA Ch1 254nm |           |          |        |         |
|---------------|-----------|----------|--------|---------|
| Peak#         | Ret. Time | Area     | Height | Area%   |
| 1             | 15.070    | 11679986 | 506366 | 49.981  |
| 2             | 17.969    | 11688789 | 426735 | 50.019  |
| Total         |           | 23368775 | 933101 | 100.000 |

<Peak Table>

| PDA Ch1 220nm |           |          |        |         |
|---------------|-----------|----------|--------|---------|
| Peak#         | Ret. Time | Area     | Height | Area%   |
| 1             | 14.887    | 11364708 | 493945 | 88.868  |
| 2             | 17.798    | 1423556  | 53374  | 11.132  |
| Total         |           | 12788263 | 547319 | 100.000 |

The  $^1\text{H}$ ,  $^{13}\text{C}$ ,  $^{31}\text{P}$  NMR spectra and HPLC spectrum of compound 7I

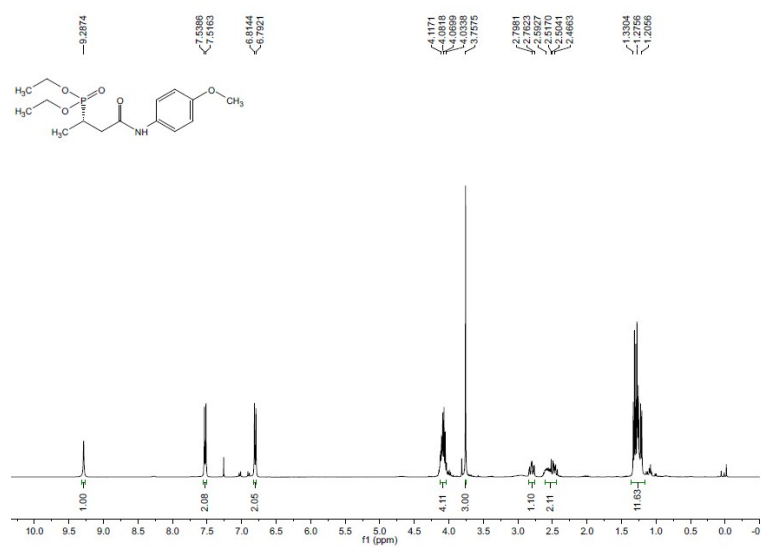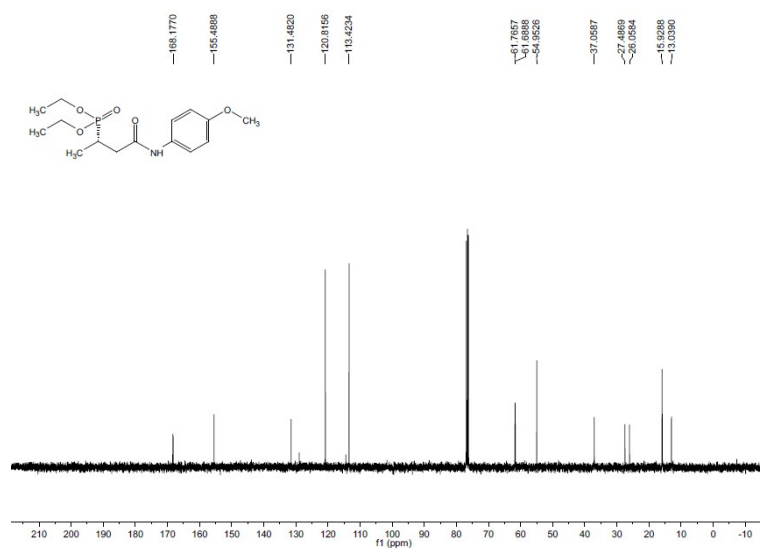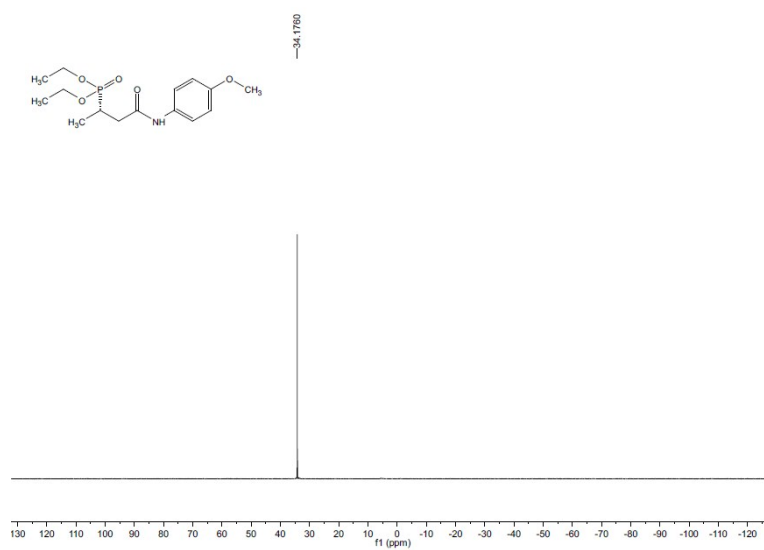

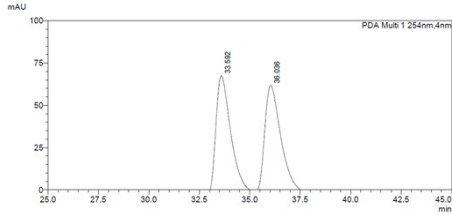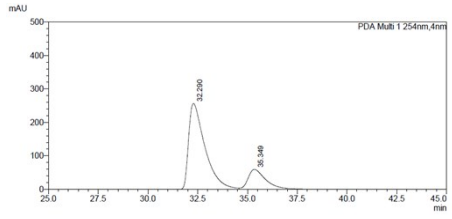

**<Peak Table>**

| PDA Ch1 254nm |           |         |        |         |
|---------------|-----------|---------|--------|---------|
| Peak#         | Ret. Time | Area    | Height | Area%   |
| 1             | 33.592    | 3750953 | 70784  | 49.639  |
| 2             | 36.036    | 3805525 | 65061  | 50.361  |
| Total         |           | 7556478 | 135844 | 100.000 |

**<Peak Table>**

| PDA Ch1 254nm |           |          |        |         |
|---------------|-----------|----------|--------|---------|
| Peak#         | Ret. Time | Area     | Height | Area%   |
| 1             | 32.290    | 14634434 | 256779 | 80.306  |
| 2             | 35.349    | 3588956  | 59035  | 19.694  |
| Total         |           | 18223390 | 315815 | 100.000 |

The  $^1\text{H}$ ,  $^{13}\text{C}$ ,  $^{31}\text{P}$  NMR spectra and HPLC spectrum of compound **7m**

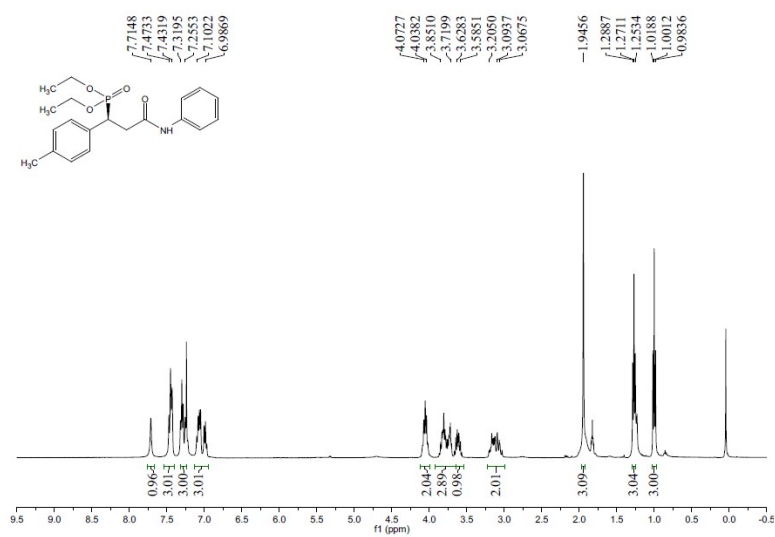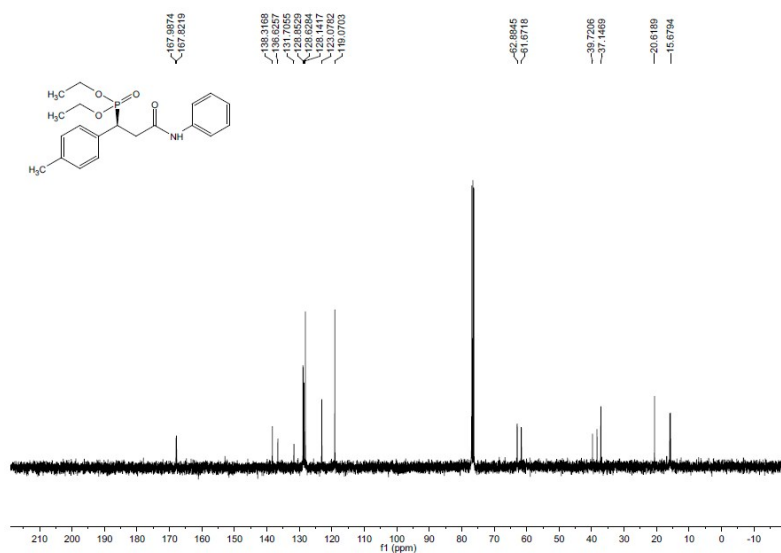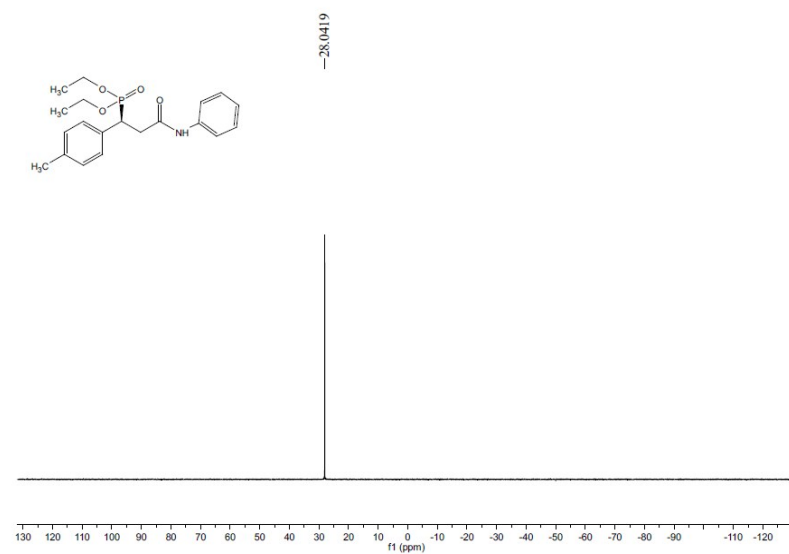

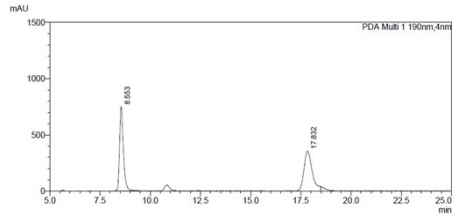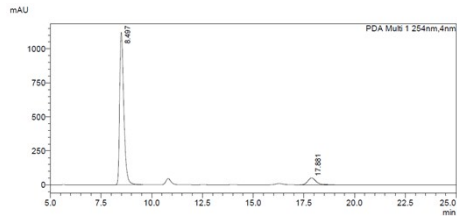

**<Peak Table>**

| PDA Ch1 190nm |           |          |         |         |
|---------------|-----------|----------|---------|---------|
| Peak#         | Ret. Time | Area     | Height  | Area%   |
| 1             | 8.553     | 9967646  | 751619  | 49.847  |
| 2             | 17.832    | 10029018 | 355304  | 50.153  |
| Total         |           | 19996665 | 1106922 | 100.000 |

**<Peak Table>**

| PDA Ch1 254nm |           |          |         |         |
|---------------|-----------|----------|---------|---------|
| Peak#         | Ret. Time | Area     | Height  | Area%   |
| 1             | 8.497     | 15986596 | 1120462 | 91.595  |
| 2             | 17.881    | 1466941  | 50885   | 8.405   |
| Total         |           | 17453537 | 1171347 | 100.000 |



The  $^1\text{H}$ ,  $^{13}\text{C}$ ,  $^{31}\text{P}$  NMR spectra and HPLC spectrum of compound **7n**

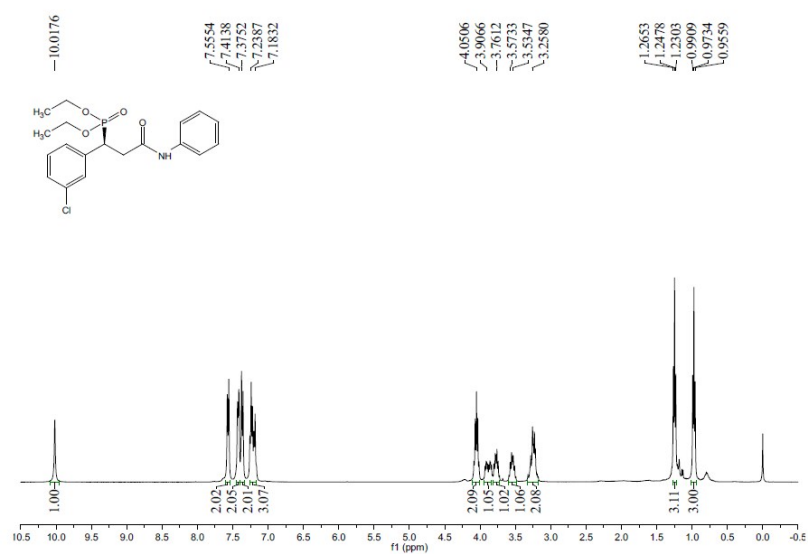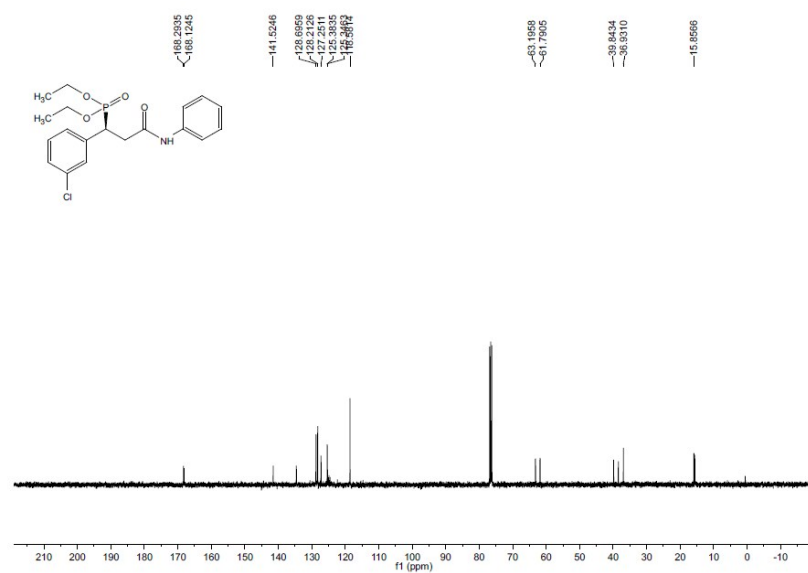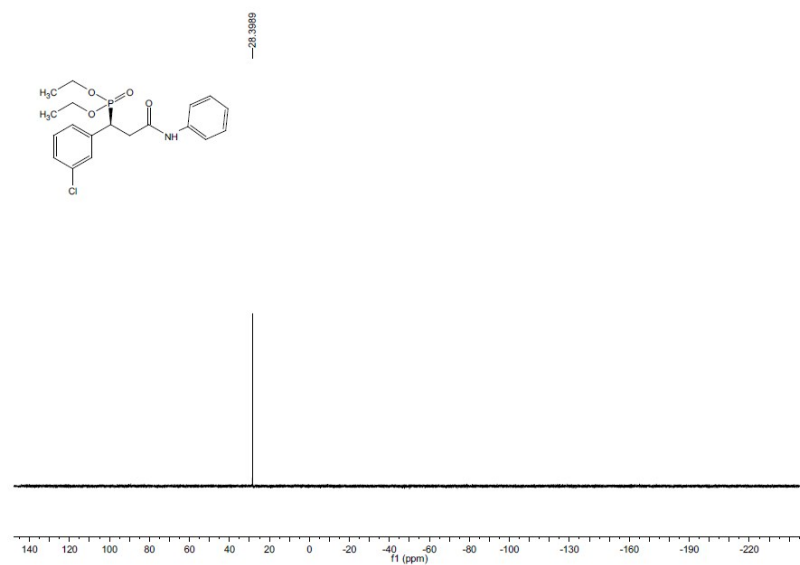

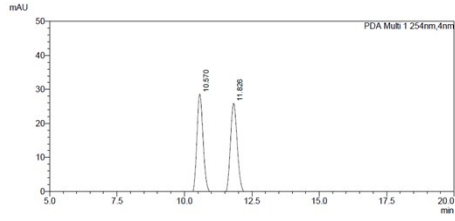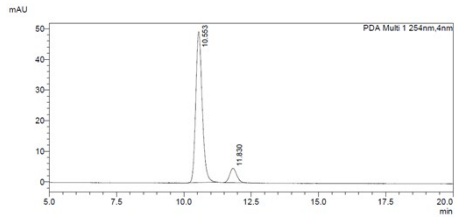

**<Peak Table>**

| PDA Ch1 254nm |           |         |        |         |
|---------------|-----------|---------|--------|---------|
| Peak#         | Ret. Time | Area    | Height | Area%   |
| 1             | 10.570    | 497163  | 29780  | 49.652  |
| 2             | 11.826    | 504137  | 27173  | 50.348  |
| Total         |           | 1001300 | 56953  | 100.000 |

**<Peak Table>**

| PDA Ch1 254nm |           |        |        |         |
|---------------|-----------|--------|--------|---------|
| Peak#         | Ret. Time | Area   | Height | Area%   |
| 1             | 10.553    | 822059 | 49243  | 90.556  |
| 2             | 11.830    | 85729  | 4696   | 9.444   |
| Total         |           | 907789 | 53939  | 100.000 |

The  $^1\text{H}$ ,  $^{13}\text{C}$ ,  $^{31}\text{P}$ ,  $^{19}\text{F}$  NMR spectra and HPLC spectrum of compound **7o**

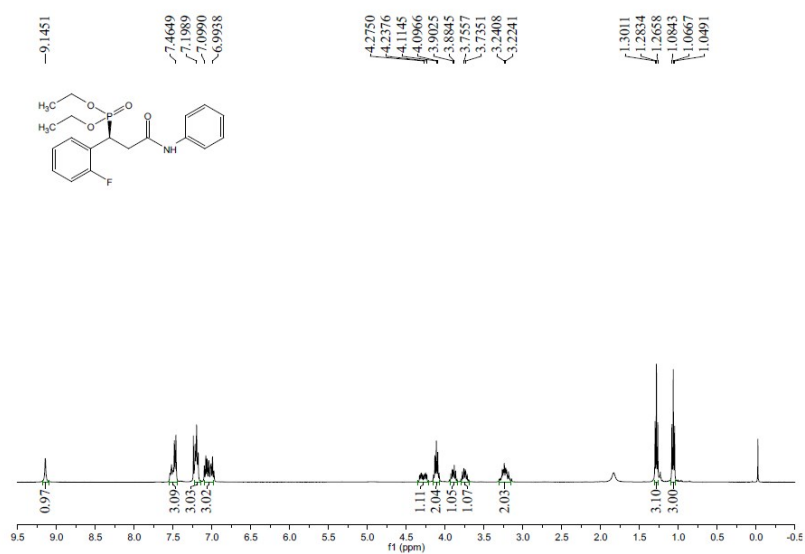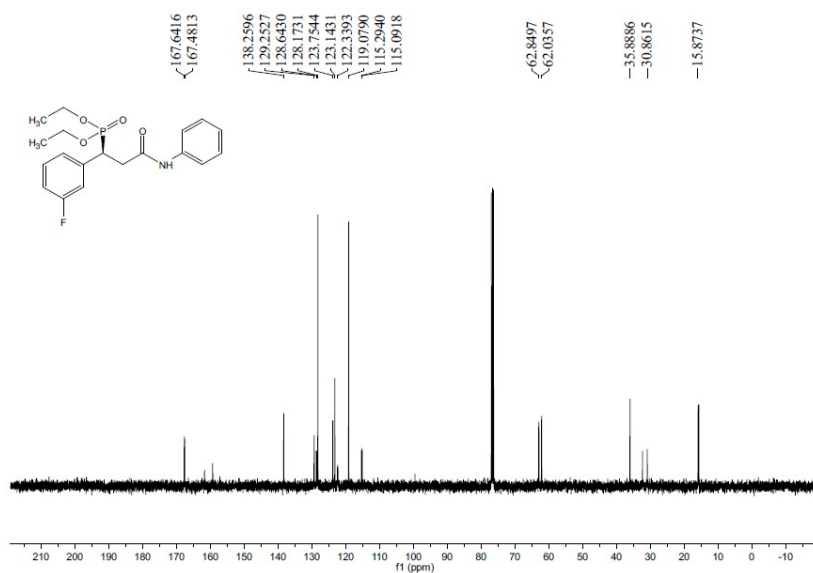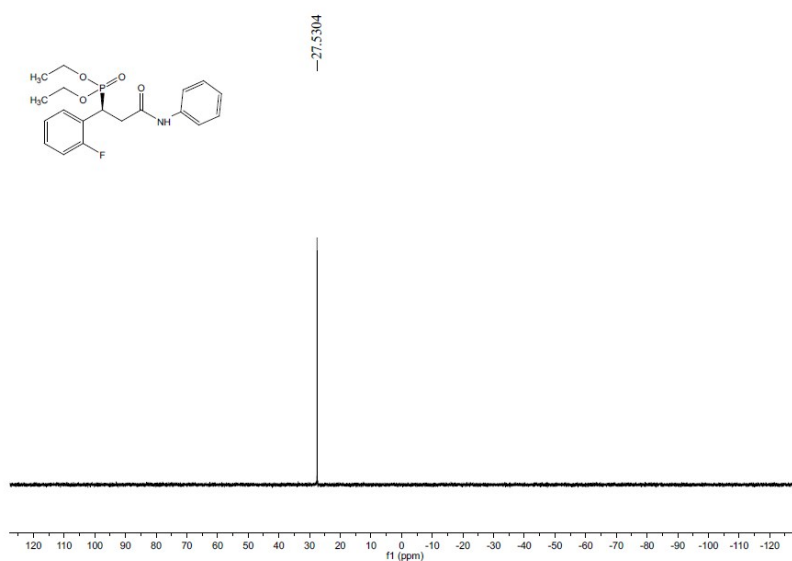

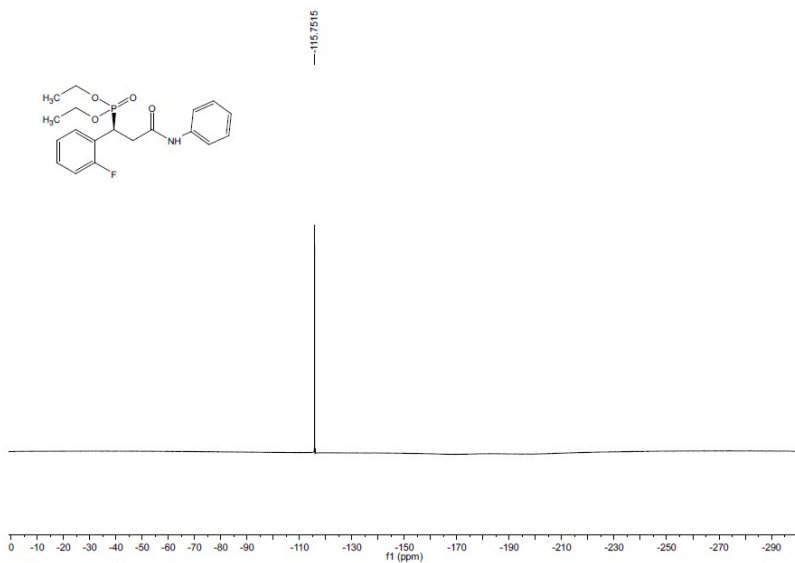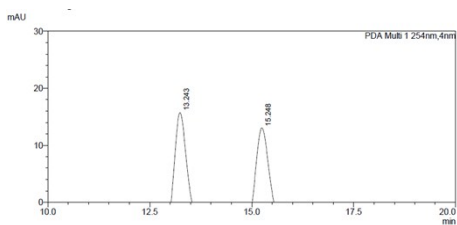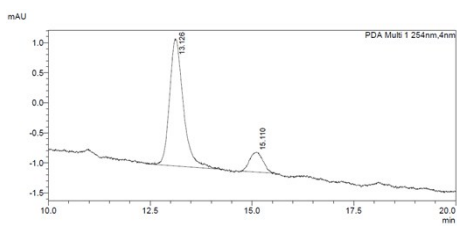

**<Peak Table>**

| PDA Ch1 254nm |           |        |        |         |
|---------------|-----------|--------|--------|---------|
| Peak#         | Ret. Time | Area   | Height | Area%   |
| 1             | 13.243    | 426383 | 19706  | 49.877  |
| 2             | 15.248    | 428490 | 17530  | 50.123  |
| Total         |           | 854873 | 37236  | 100.000 |

**<Peak Table>**

| PDA Ch1 254nm |           |       |        |         |
|---------------|-----------|-------|--------|---------|
| Peak#         | Ret. Time | Area  | Height | Area%   |
| 1             | 13.126    | 49646 | 2115   | 86.850  |
| 2             | 15.110    | 7517  | 334    | 13.150  |
| Total         |           | 57163 | 2449   | 100.000 |

The  $^1\text{H}$ ,  $^{13}\text{C}$ ,  $^{31}\text{P}$ ,  $^{19}\text{F}$  NMR spectra and HPLC spectrum of compound **7p**

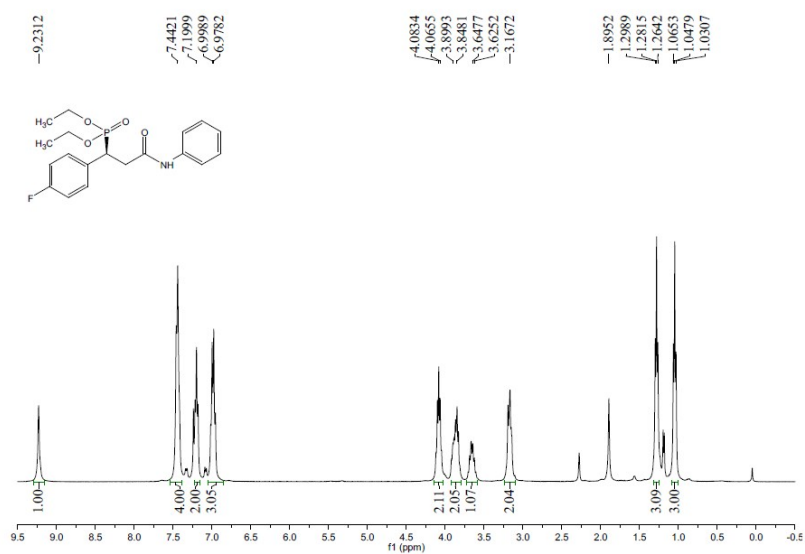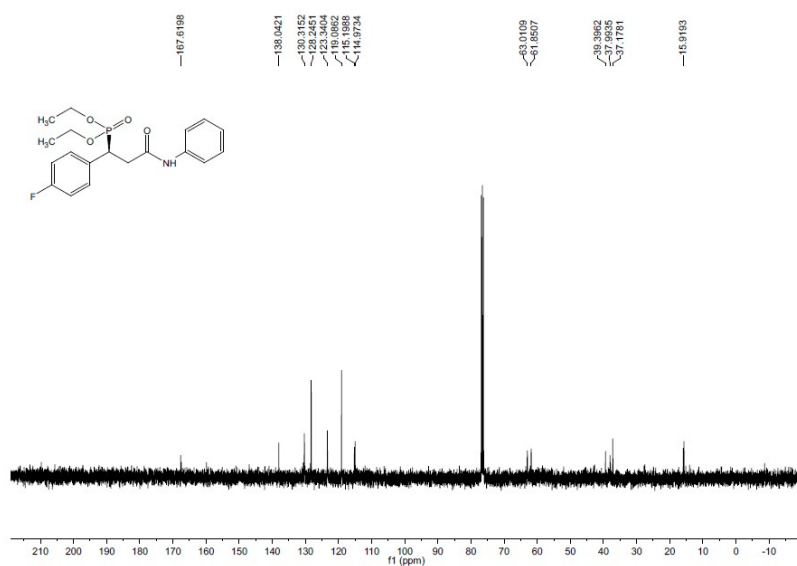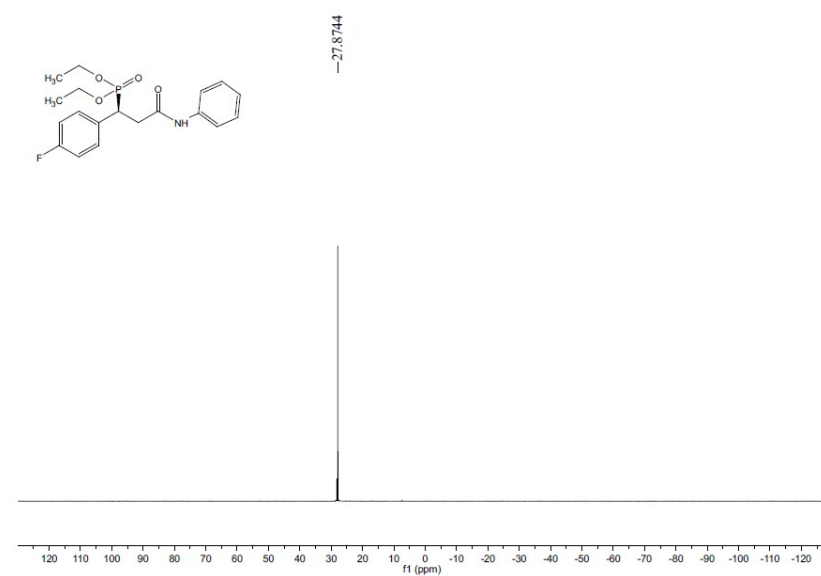

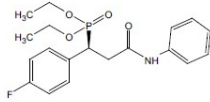

—114.6531

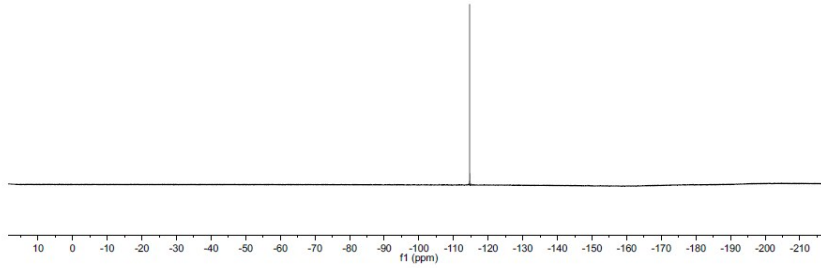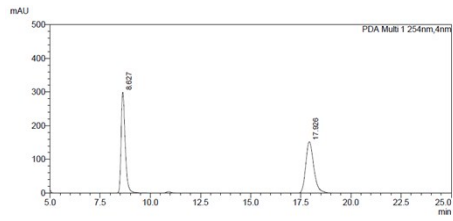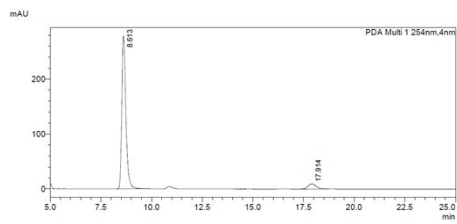

<Peak Table>

| PDA Ch1 254nm |           |         |        |         |
|---------------|-----------|---------|--------|---------|
| Peak#         | Ret. Time | Area    | Height | Area%   |
| 1             | 8.627     | 4271617 | 300672 | 49.514  |
| 2             | 17.926    | 4355498 | 153682 | 50.486  |
| Total         |           | 8627115 | 454353 | 100.000 |

<Peak Table>

| PDA Ch1 254nm |           |         |        |         |
|---------------|-----------|---------|--------|---------|
| Peak#         | Ret. Time | Area    | Height | Area%   |
| 1             | 8.613     | 3905938 | 278263 | 93.730  |
| 2             | 17.914    | 261299  | 9400   | 6.270   |
| Total         |           | 4167237 | 287662 | 100.000 |

The  $^1\text{H}$ ,  $^{13}\text{C}$ ,  $^{31}\text{P}$  NMR spectra and HPLC spectrum of compound **7q**

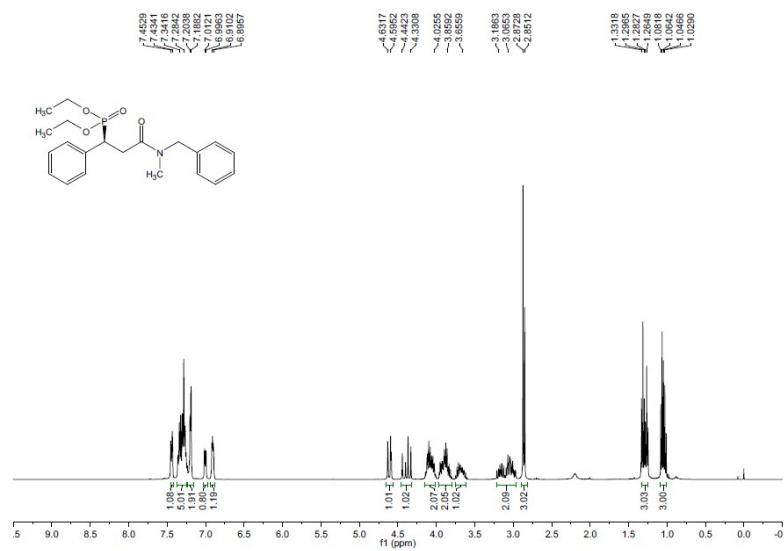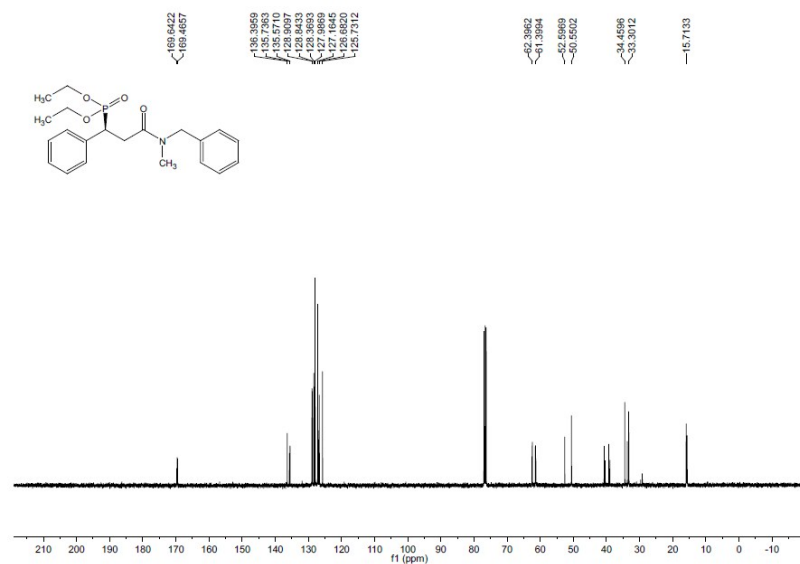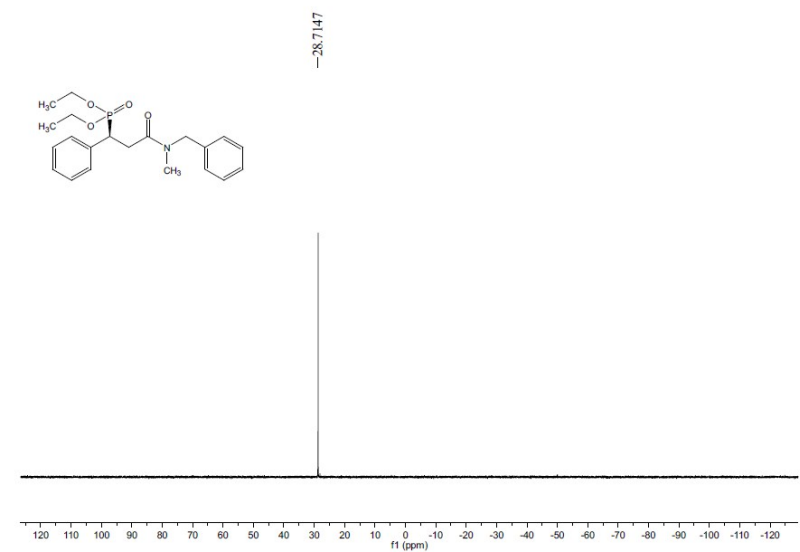

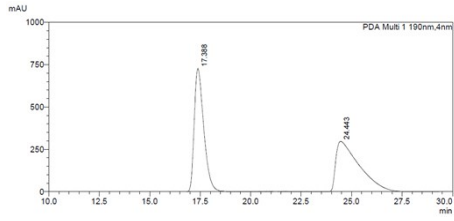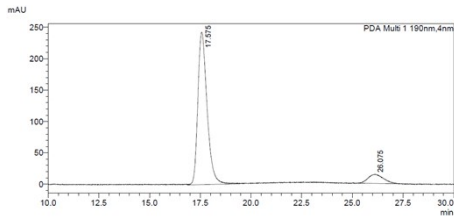

**<Peak Table>**

| PDA Ch1 190nm |           |          |         |         |
|---------------|-----------|----------|---------|---------|
| Peak#         | Ret. Time | Area     | Height  | Area%   |
| 1             | 17.388    | 24219035 | 730454  | 49.676  |
| 2             | 24.443    | 24535241 | 300211  | 50.324  |
| Total         |           | 48754276 | 1030665 | 100.000 |

**<Peak Table>**

| PDA Ch1 190nm |           |         |        |         |
|---------------|-----------|---------|--------|---------|
| Peak#         | Ret. Time | Area    | Height | Area%   |
| 1             | 17.575    | 7672711 | 242357 | 91.110  |
| 2             | 26.075    | 748651  | 14444  | 8.890   |
| Total         |           | 8421362 | 256801 | 100.000 |



The  $^1\text{H}$ ,  $^{13}\text{C}$ ,  $^{31}\text{P}$  NMR spectra and HPLC spectrum of compound **7r**

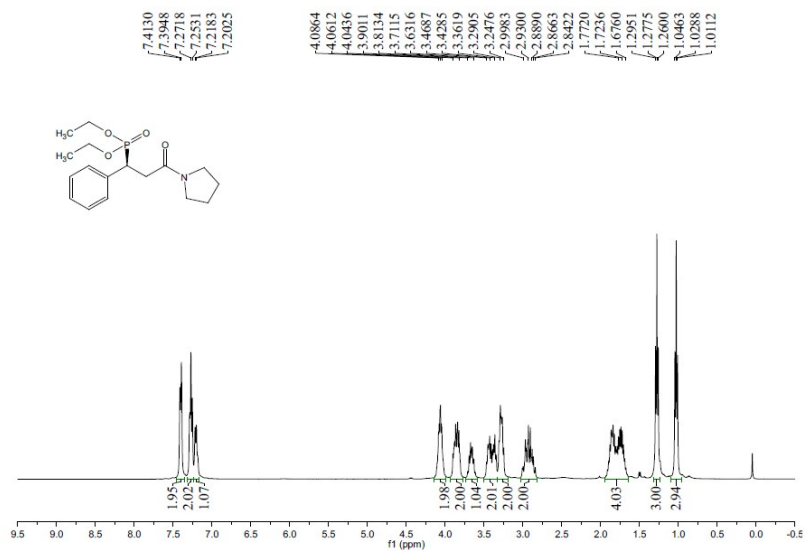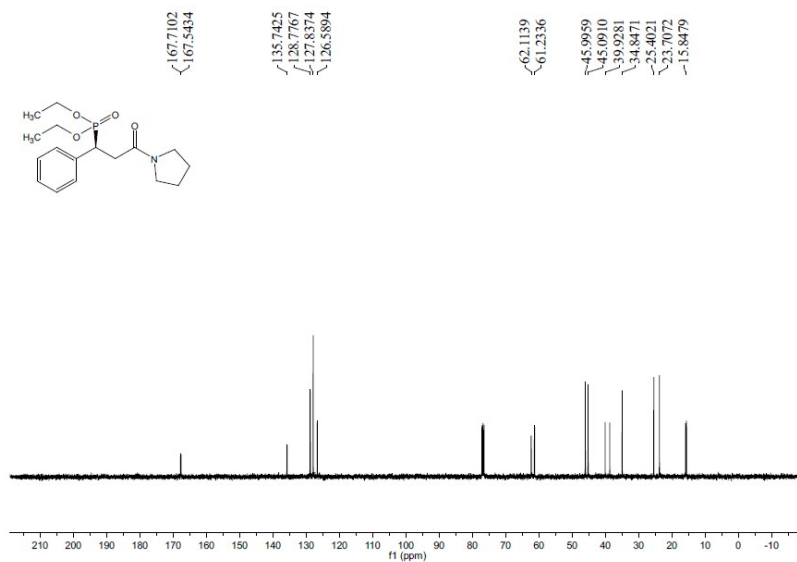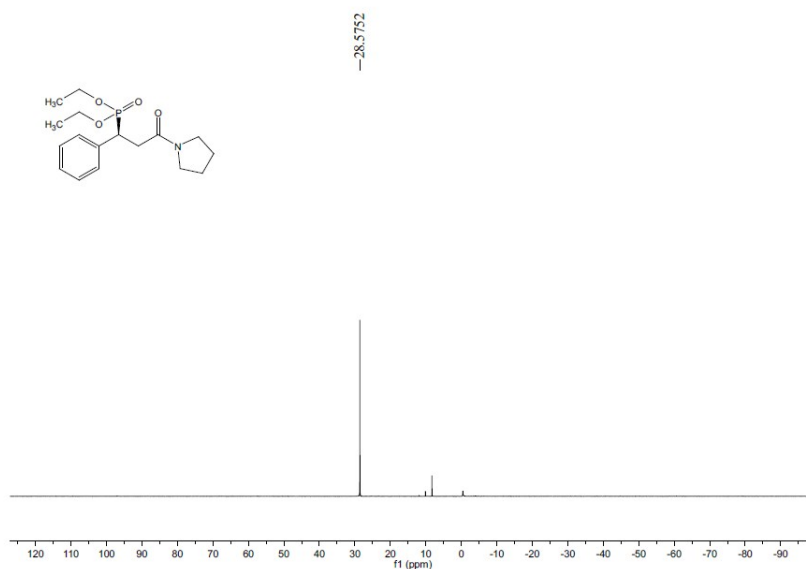

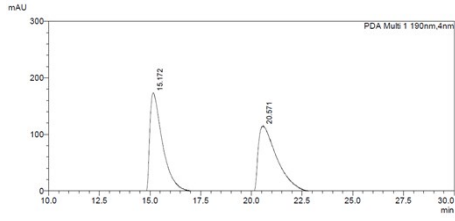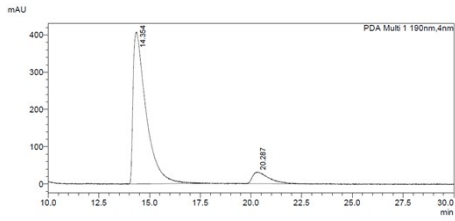

**<Peak Table>**

| PDA Ch1 190nm |           |          |        |         |
|---------------|-----------|----------|--------|---------|
| Peak#         | Ret. Time | Area     | Height | Area%   |
| 1             | 15.172    | 7938487  | 177318 | 49.126  |
| 2             | 20.571    | 8220883  | 119456 | 50.874  |
| Total         |           | 16159370 | 296774 | 100.000 |

**<Peak Table>**

| PDA Ch1 190nm |           |          |        |         |
|---------------|-----------|----------|--------|---------|
| Peak#         | Ret. Time | Area     | Height | Area%   |
| 1             | 14.354    | 18294018 | 407946 | 91.515  |
| 2             | 20.287    | 1696070  | 30957  | 8.485   |
| Total         |           | 19990088 | 438903 | 100.000 |

The  $^1\text{H}$ ,  $^{13}\text{C}$ ,  $^{31}\text{P}$  NMR spectra and HPLC spectrum of compound **7s**

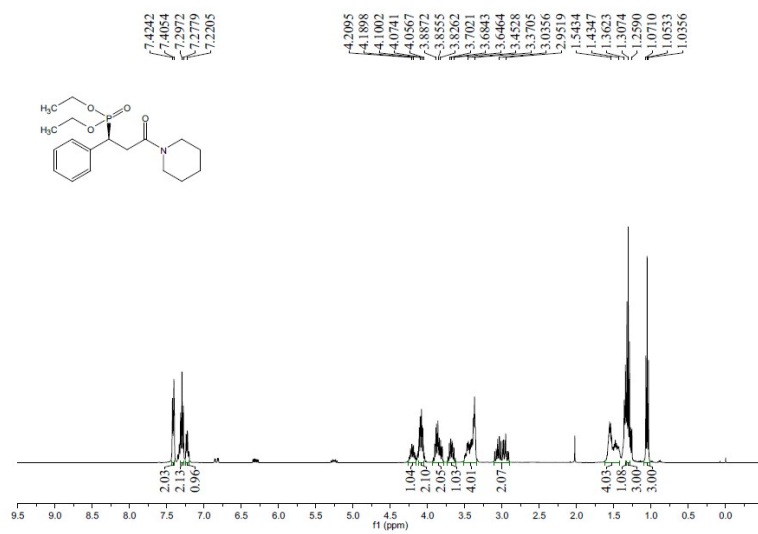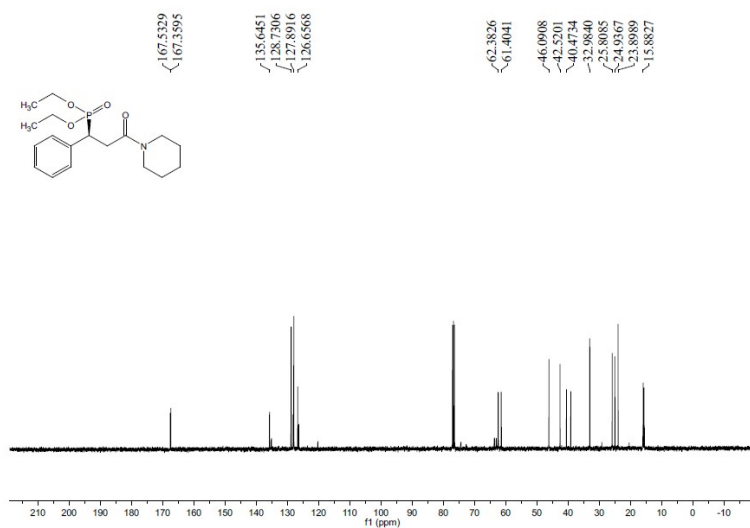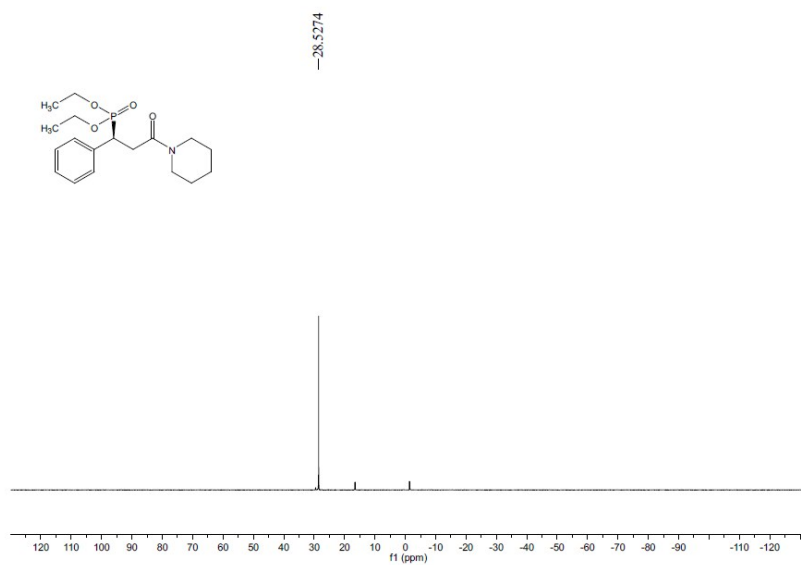

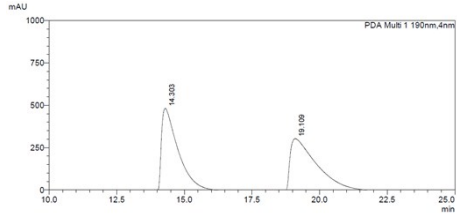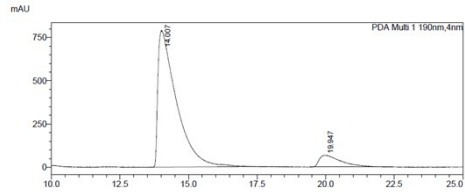

<Peak Table>

PDA Ch1 190nm

| Peak# | Ret. Time | Area     | Height | Area%   |
|-------|-----------|----------|--------|---------|
| 1     | 14.303    | 21516225 | 490351 | 49.412  |
| 2     | 19.109    | 22028437 | 314112 | 50.588  |
| Total |           | 43544662 | 804463 | 100.000 |

<Peak Table>

PDA Ch1 190nm

| Peak# | Ret. Time | Area     | Height | Area%   |
|-------|-----------|----------|--------|---------|
| 1     | 14.007    | 37140563 | 789874 | 90.762  |
| 2     | 19.947    | 3780457  | 67579  | 9.238   |
| Total |           | 40921020 | 857453 | 100.000 |

The  $^1\text{H}$ ,  $^{13}\text{C}$ ,  $^{31}\text{P}$  NMR spectra and HPLC spectrum of compound **7t**

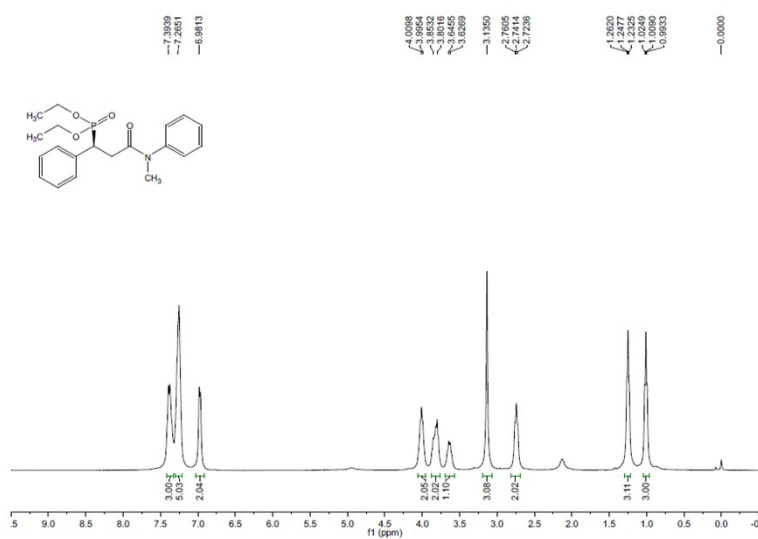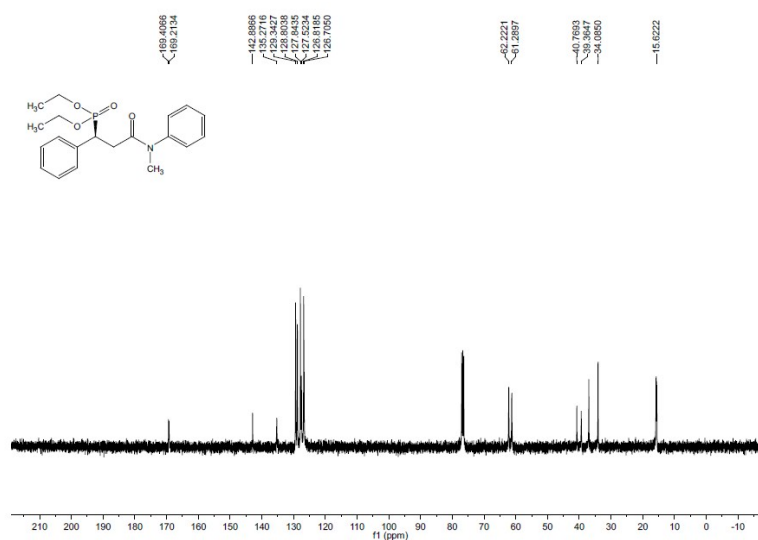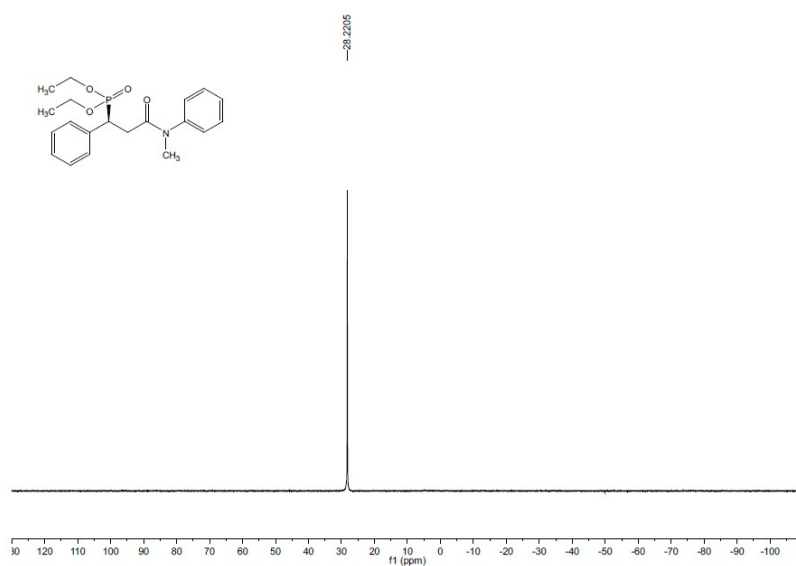

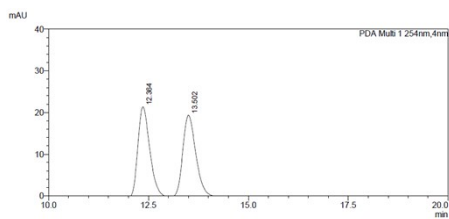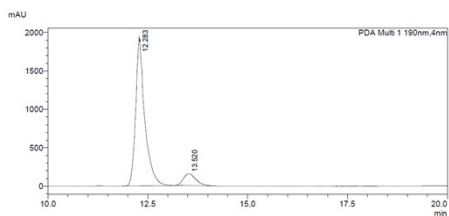

<Peak Table>

| PDA Ch1 254nm |           |        |        |         |
|---------------|-----------|--------|--------|---------|
| Peak#         | Ret. Time | Area   | Height | Area%   |
| 1             | 12.364    | 466019 | 21929  | 49.631  |
| 2             | 13.502    | 472954 | 19930  | 50.369  |
| Total         |           | 938973 | 41859  | 100.000 |

<Peak Table>

| PDA Ch1 190nm |           |          |         |         |
|---------------|-----------|----------|---------|---------|
| Peak#         | Ret. Time | Area     | Height  | Area%   |
| 1             | 12.283    | 30382339 | 1944414 | 90.292  |
| 2             | 13.520    | 3266483  | 152046  | 9.708   |
| Total         |           | 33648822 | 2096460 | 100.000 |

The HPLC spectrum of compound **7a** after recrystallization

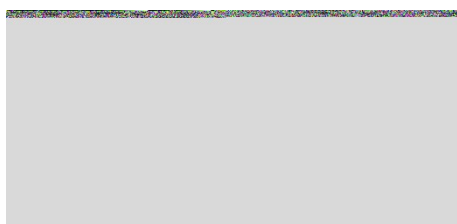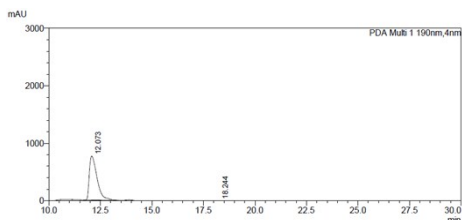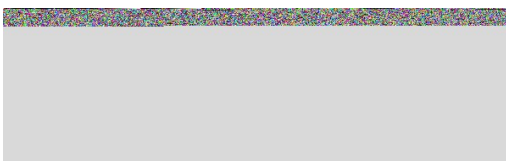

<Peak Table>

| PDA Ch1 190nm |           |          |        |         |
|---------------|-----------|----------|--------|---------|
| Peak#         | Ret. Time | Area     | Height | Area%   |
| 1             | 12.073    | 19809722 | 762808 | 98.795  |
| 2             | 18.244    | 241560   | 8038   | 1.205   |
| Total         |           | 20051283 | 770846 | 100.000 |

The HPLC spectrum of single crystal of **7a**

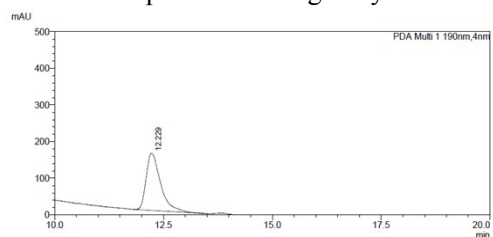

<Peak Table>

| PDA Ch1 190nm |           |         |        |         |
|---------------|-----------|---------|--------|---------|
| Peak#         | Ret. Time | Area    | Height | Area%   |
| 1             | 12.229    | 3568854 | 156292 | 100.000 |
| Total         |           | 3568854 | 156292 | 100.000 |

The  $^1\text{H}$ ,  $^{13}\text{C}$  spectra of compound Complex 8

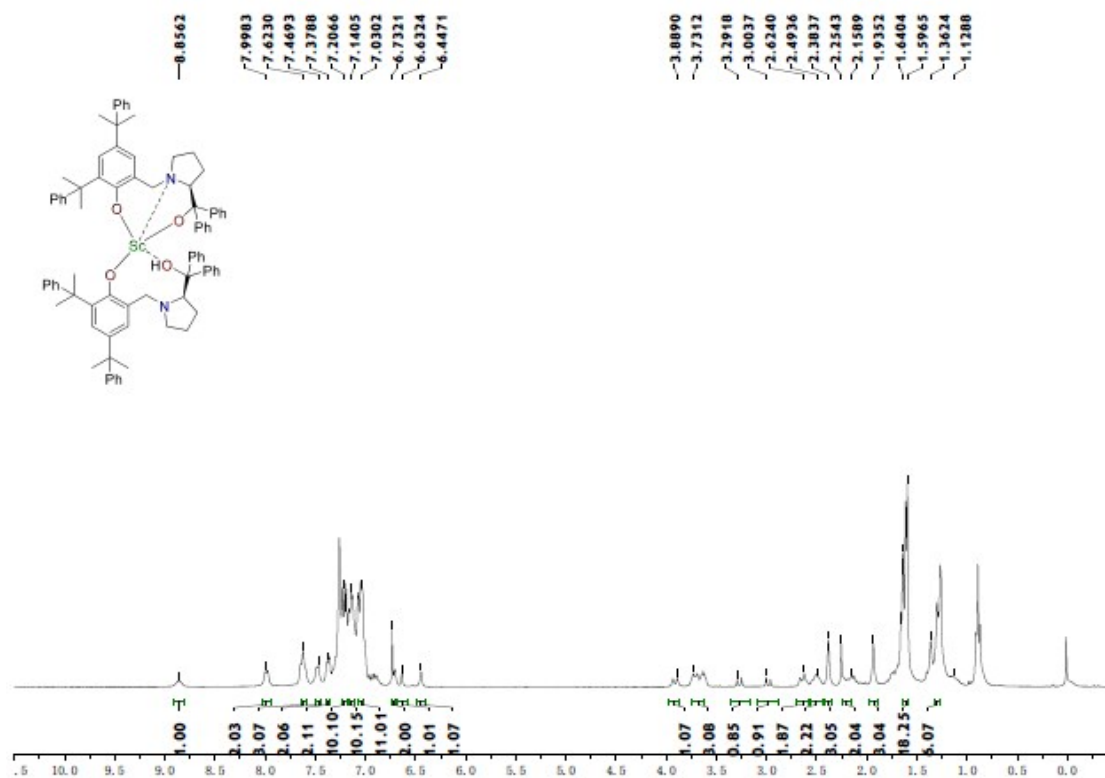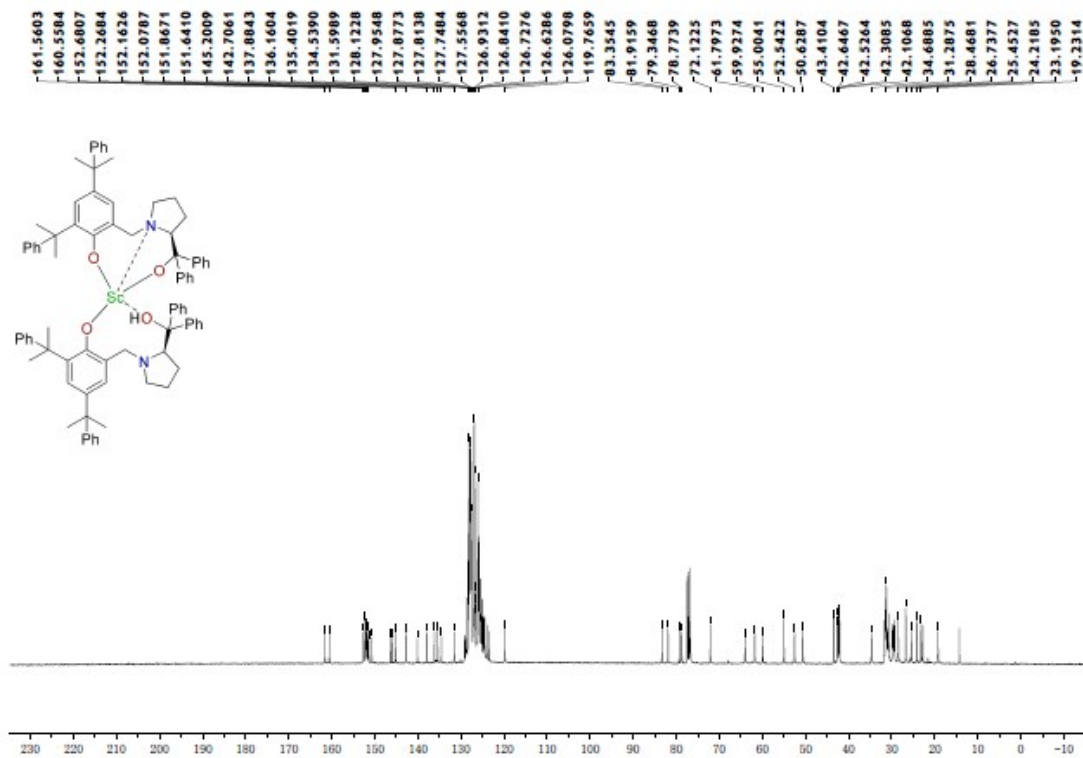

**Reference:**

- [1] (a) C. Zeng, D. Yuan, B. Zhao, Y. Yao, *Organic Letters*, 2014, **17**(9), 2242-2245.
- [2] (a) S. Yang, T. Kang, C. Rui, X. Yang, Y. Sun, Z. Cui, Y. Ling, *Chin. J. Chem.*, 2011, **29**(11), 2394-2400. (b) S. Ueda, T. Okada, H. Nagasawa, *Chem. Commun.*, 2010, **46**(14), 2462-2464. (c) C.-W. Chan, P.-Y. Lee, W.-Y. Yu, *Tetrahedron Letters*, 2015, **56**(20), 2559-2563. (d) W. Dong, Y. Liu, B. Hu, K. Ren, Y. Li, X. Xie, Y. Jiang, Z. Zhang, *Chem. Commun.*, 2015, **51**(22), 4587-4590.
